# Supplementary material for: Intramolecular C–O/C–S bond insertion of α-diazoesters for the synthesis of 2-aryl-4H-benzo[d][1,3]oxazine and 2-aryl-4H-benzo[d][1,3]thiazine derivatives
Source: Royal Society of Chemistry journal article supplement (doi:10.1039/c4ra08208g), 2014-01-01
Supplement: c4ra08208g1.pdf [file c4ra08208g1.pdf]

## Supporting Information for

# Intramolecular C-O/C-S bond insertion of $\alpha$ -diazoesters for the synthesis of 2-aryl-4*H*-benzo[d][1,3]oxazine and 2-aryl-4*H*-benzo[d][1,3]thiazine derivatives

B. V. Subba Reddy,<sup>a\*</sup> R. Anji Babu,<sup>a,b</sup> M. Ramana Reddy,<sup>a</sup> B. Jagan Mohan Reddy,<sup>b</sup>  
B. Sridhar<sup>c</sup>

<sup>a</sup>Natural Product Chemistry, <sup>c</sup>Laboratory of X-ray, Crystallography CSIR-Indian Institute of Chemical Technology, Hyderabad –500 007, India. E-mail: basireddy@iict.res.in.

<sup>b</sup>Department of Organic Chemistry, Adikavi Nannaya University, Rajahmundry, 533105, India

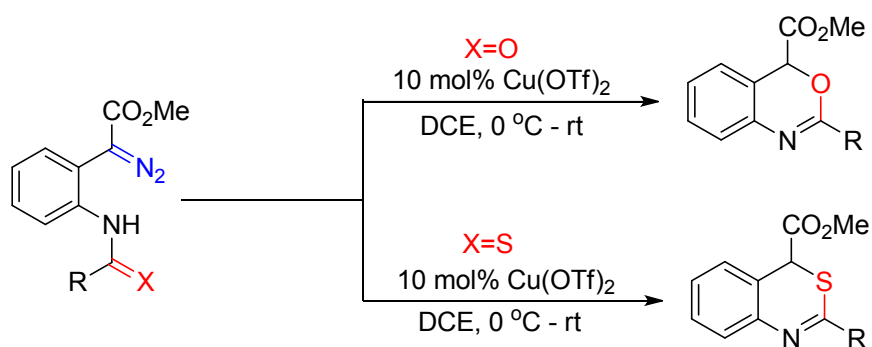

## Table of contents

|                                                                                                                    |         |
|--------------------------------------------------------------------------------------------------------------------|---------|
| 1. General                                                                                                         | S2      |
| 2. General Procedures                                                                                              | S2-S3   |
| 3. Characterization data of products <b>1h</b> , <b>3d</b> , <b>2d</b> , <b>2e</b> , <b>5a-5h</b> and <b>6a-6d</b> | S4-S10  |
| 4. Copies of $^1\text{H}$ and $^{13}\text{C}$ NMR spectra of products                                              | S11-S26 |

## 1. General

IR spectra were recorded on FT-IR spectrometer (KBr) and reported in reciprocal centimetres (cm<sup>-1</sup>). <sup>1</sup>H NMR spectra were recorded at 500 MHz, 300 MHz and <sup>13</sup>C NMR at 125 MHz, 75 MHz. For <sup>1</sup>H NMR, tetramethylsilane (TMS) was used as internal standard ( $\delta = 0$ ) and the values are reported as follows: chemical shift, integration, multiplicity (s = singlet, d = doublet, t = triplet, q = quartet, m = multiplet, br = broad), and the coupling constants in Hz. For <sup>13</sup>C NMR, CDCl<sub>3</sub> ( $\delta = 77.27$ ) was used as internal standard and spectra were obtained with complete proton decoupling. Low-resolution MS and HRMS data were obtained using ESI ionization. Melting points were measured on micro melting point apparatus. Commercially available amides, acid chlorides and Cu(OTf)<sub>2</sub> were used without further purification. dichloroethane were distilled from CaH under N<sub>2</sub> atmosphere.

**Scheme 1.** Synthetic procedure for **2** and **4**

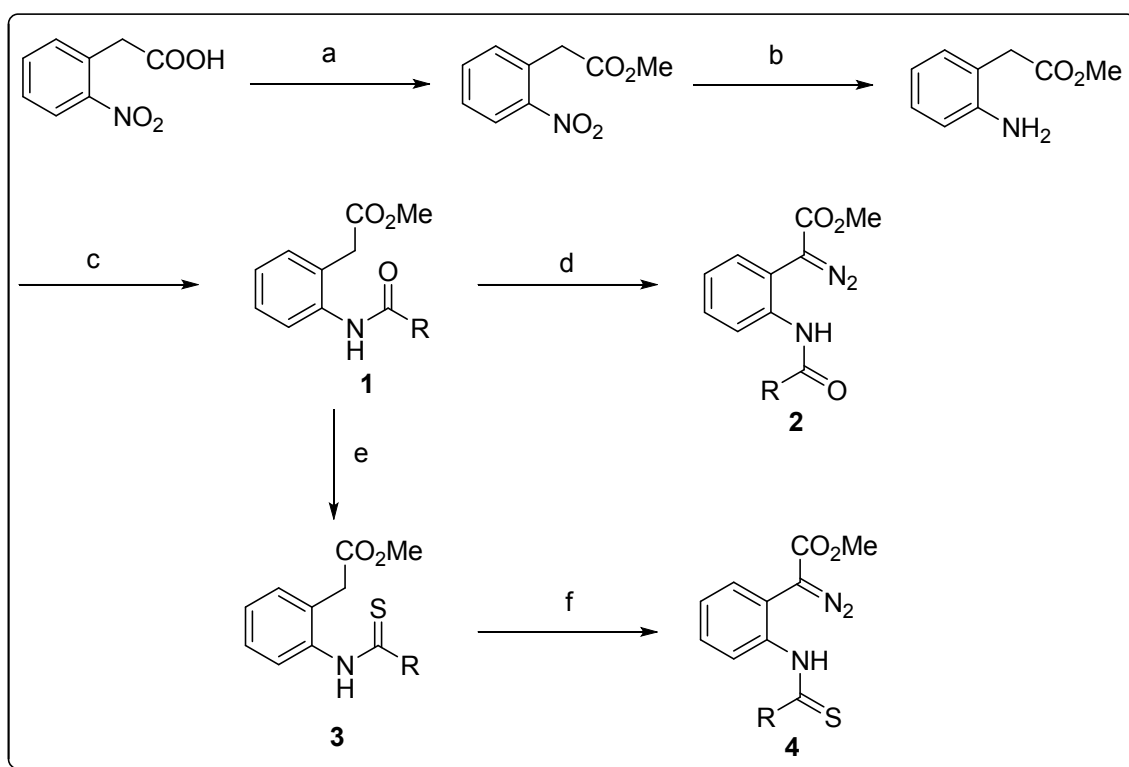

**Reagents & conditions:** (a) MeOH, HCl, 0 °C to rt (b) H<sub>2</sub>, 10% Pd/C, EtOAc, rt (c) RCOCl, Et<sub>3</sub>N, DCM, rt (d) PMBSA, DBU, CH<sub>3</sub>CN, 0 °C, rt, 90-95% yield (e) Lawesson's reagent, toluene, 70°C (f) PMBSA, DBU, CH<sub>3</sub>CN, 0°C, rt, 85-90% yield

**General procedure for the synthesis of methyl 2-(2-arylthioamidophenyl)acetate (3):**

A solution of methyl 2-(2-aryl amidophenyl)acetate (**1**) (1 mmol) and Lawesson's reagent (1 mmol) in toluene (10 mL) was heated under reflux in inert atmosphere for 15 min. After removal of the solvent, the residue was purified by silica gel column chromatography using hexane-ethyl acetate to give the thioamidophenyl acetate (**3**).

**General procedure for the synthesis of diazo compound 2 or 4 (Scheme 1):**

To a stirred solution of **1** or **3** (1 mmol) and *p*-methylbenzenesulfonylazide (1.5 mmol) in acetonitrile (5 mL) was added 1,8-Diazabicycloundec-7-ene (1.5 mmol) at 0 °C. The reaction mixture was then allowed to warm to room temperature. After stirring for 1 h, the reaction mixture was quenched with aqueous NH<sub>4</sub>Cl, extracted with diethyl ether and dried over anhydrous Na<sub>2</sub>SO<sub>4</sub>. The solvent was removed under reduced pressure and purified by flash column chromatography on silica gel to give the corresponding diazo compound **2** or **4**.

**General procedure for the synthesis of benzoxazine or benzothiazine (5&6):**

To a stirred solution of **2** or **4** (1 mmol) in dichloroethane (5 mL) was added Cu(OTf)<sub>2</sub> (10 mol %) at 0 °C. The resulting mixture was stirred at 25 °C under nitrogen atmosphere. The pale yellow mixture was stirred until it turned to pale red colour (10-30 min). The mixture was then quenched with saturated NaHCO<sub>3</sub> solution (1.0 mL) and extracted with dichloromethane (2-5 mL). The combined organic layers were washed with brine solution (3-5 mL), dried over anhydrous Na<sub>2</sub>SO<sub>4</sub>, and concentrated in vacuo. The resulting crude product was purified by silica gel column chromatography (100–200 mesh) using ethyl acetate/hexane as eluent to afford the pure product.

**Characterization data of products:****Methyl 2-(2-(4-chlorobenzamido)phenyl)acetate (1h):**

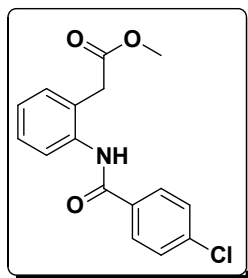

Solid, m.p.92-94 °C;  $^1\text{H}$  NMR (500 MHz,  $\text{CDCl}_3$ ):  $\delta$  9.80 (bs, 1H), 8.03-7.99 (m, 2H), 7.70 (d,  $J= 8.6$  Hz, 1H), 7.50 (d,  $J= 8.5$  Hz, 1H), 7.40-7.32 (m, 2H), 7.27-7.23 (m, 1H), 7.18-7.15 (m, 1H), 3.78 (s, 3H), 3.71 (s, 2H) ppm;  $^{13}\text{C}$  NMR (75 MHz,  $\text{CDCl}_3$ ):  $\delta$  173.0, 171.3, 170.1, 163.8, 138.5, 137.6, 136.2, 132.4, 131.4, 130.4, 130.2, 128.5, 128.3, 128.1, 125.1, 125.0, 124.4, 52.9, 39.1 ppm; MS (ESI):  $m/z$  ( $[\text{M}+\text{H}]^+$ ): 304.

**Methyl 2-(2-(4-chlorophenylthioamido)phenyl)acetate (3d):**

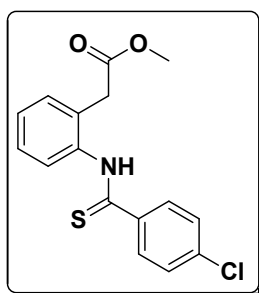

Solid, m.p.114-116 °C;  $^1\text{H}$  NMR (300 MHz,  $\text{CDCl}_3$ ):  $\delta$  10.47 (bs, 1H), 7.98-7.92 (m, 3H), 7.47-7.28 (m, 5H), 3.74 (s, 3H), 3.70 (s, 2H) ppm;  $^{13}\text{C}$  NMR (75 MHz,  $\text{CDCl}_3$ ):  $\delta$  196.3, 172.7, 139.3, 138.1, 137.3, 130.6, 128.4, 127.9, 127.8, 127.3, 127.2, 52.9, 38.6 ppm; MS (ESI):  $m/z$  ( $[\text{M}+\text{H}]^+$ ): 320.

**Methyl 2-(2-(4-cyanobenzamido)phenyl)-2-diazoacetate (2d):**

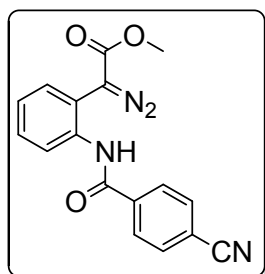

Yellow Solid, m.p.112-114 °C;  $^1\text{H}$  NMR (300 MHz,  $\text{CDCl}_3$ ):  $\delta$  9.74 (bs, 1H), 8.07 (d,  $J= 8.3$  Hz, 3H), 7.81 (d,  $J= 8.4$  Hz, 3H), 7.32-7.25 (m, 2H), 3.92 (s, 3H) ppm;  $^{13}\text{C}$  NMR (75 MHz,

CDCl<sub>3</sub>):  $\delta$  168.3, 153.9, 137.2, 131.6, 129.8, 128.3, 119.5, 118.1, 114.4, 74.4, 53.1 ppm; MS (ESI):  $m/z$  ([M+H]<sup>+</sup>): 321.

**Methyl 2-diazo-2-(2-(thiophene-2-carboxamido)phenyl)acetate (2e):**

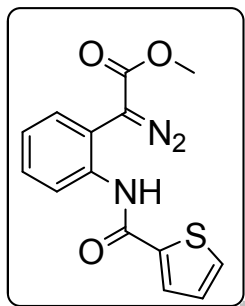

Yellow Solid, m.p. 108-110 °C; <sup>1</sup>H NMR (300 MHz, CDCl<sub>3</sub>):  $\delta$  9.41 (bs, 1H), 7.99 (d,  $J$  = 8.1 Hz, 1H), 7.65 (d,  $J$  = 4.7 Hz, 1H), 7.45 (d,  $J$  = 5.9 Hz, 1H), 7.28-7.20 (m, 2H), 7.14-7.09 (m, 2H), 3.93 (s, 3H) ppm; <sup>13</sup>C NMR (75 MHz, CDCl<sub>3</sub>):  $\delta$  173.6, 160.1, 139.8, 136.6, 130.8, 128.5, 128.4, 127.8, 125.2, 124.6, 52.7, 38.9 ppm; MS (ESI):  $m/z$  ([M+H]<sup>+</sup>): 302.

**Methyl 2-phenyl-4H-benzo[d][1,3]oxazine-4-carboxylate (5a):**

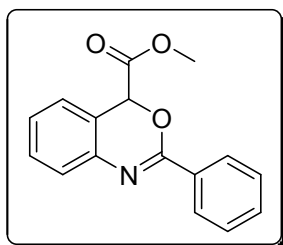

Solid, m.p. 104-106 °C; <sup>1</sup>H NMR (500 MHz, CDCl<sub>3</sub>):  $\delta$  8.01 (d,  $J$  = 7.9 Hz, 2H), 7.57 (d,  $J$  = 7.6 Hz, 1H), 7.48-7.19 (m, 6H), 4.32 (s, 1H), 3.59 (s, 3H) ppm; <sup>13</sup>C NMR (125 MHz, CDCl<sub>3</sub>):  $\delta$  168.5, 155.7, 137.8, 131.6, 131.1, 129.5, 127.8, 127.7, 126.3, 125.1, 124.8, 119.5, 74.2, 52.8 ppm; MS (ESI):  $m/z$  ([M+H]<sup>+</sup>): 268; HRMS (ESI):  $m/z$  calcd for C<sub>16</sub>H<sub>14</sub>O<sub>3</sub>N: 268.09727; found: 268.09728.

**Methyl 2-(2-bromophenyl)-4H-benzo[d][1,3]oxazine-4-carboxylate (5b):**

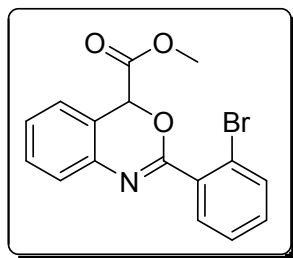

Solid, m.p.82-84 °C;  $^1\text{H}$  NMR (500 MHz,  $\text{CDCl}_3$ ):  $\delta$  7.96 (d,  $J= 9.3$  Hz, 1H), 7.70 (d,  $J= 7.9$  Hz, 1H), 7.46-7.29 (m, 6H), 5.99 (s, 1H), 3.82 (s, 3H) ppm;  $^{13}\text{C}$  NMR (125 MHz,  $\text{CDCl}_3$ ):  $\delta$  167.9, 155.1, 137.0, 133.0, 130.8, 129.4, 126.8, 126.6, 124.8, 124.8, 121.0, 118.8, 74.6, 53.1 ppm; MS (ESI):  $m/z$  ( $[\text{M}+\text{H}]^+$ ): 346; HRMS (ESI):  $m/z$  calcd for  $\text{C}_{16}\text{H}_{13}\text{O}_3\text{NBr}$ : 346.00825; found: 346.00827.

**Methyl 2-(4-methoxyphenyl)-4H-benzo[d][1,3]oxazine-4-carboxylate (5c):**

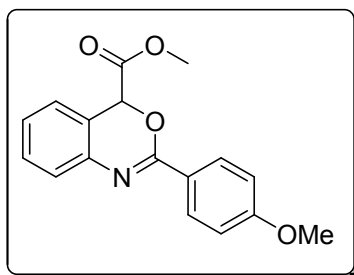

Solid, m.p.102-104 °C;  $^1\text{H}$  NMR (500 MHz,  $\text{CDCl}_3$ ):  $\delta$  8.13 (d,  $J= 8.9$  Hz, 2H), 7.37-7.17 (m, 4H), 6.95 (d,  $J= 8.9$  Hz, 2H), 5.91 (s, 1H), 3.87 (s, 3H), 3.72 (s, 3H) ppm;  $^{13}\text{C}$  NMR (75 MHz,  $\text{CDCl}_3$ ):  $\delta$  169.2, 166.0, 164.0, 155.4, 138.2, 130.6, 130.0, 126.7, 125.6, 125.1, 119.8, 115.4, 115.2, 74.3, 55.0, 52.8 ppm; MS (ESI):  $m/z$  ( $[\text{M}+\text{H}]^+$ ): 298; HRMS (ESI):  $m/z$  calcd for  $\text{C}_{17}\text{H}_{16}\text{O}_4\text{N}$ : 298.10731; found: 298.10750

**Methyl 2-(4-cyanophenyl)-4H-benzo[d][1,3]oxazine-4-carboxylate (5d):**

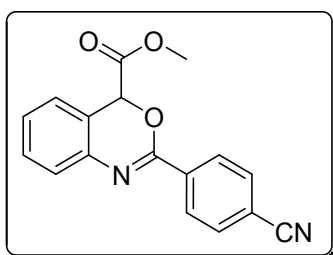

Solid, m.p.94-96 °C;  $^1\text{H}$  NMR (500 MHz,  $\text{CDCl}_3$ ):  $\delta$  8.30 (d,  $J= 8.3$  Hz, 2H), 7.75 (d,  $J= 8.3$  Hz, 2H), 7.37-7.25 (m, 4H), 5.98 (s, 1H), 3.76 (s, 3H) ppm;  $^{13}\text{C}$  NMR (75 MHz,  $\text{CDCl}_3$ ):  $\delta$  169.0, 154.4, 137.7, 136.2, 131.9, 130.1, 128.6, 127.6, 125.7, 119.8, 118.4, 114.6, 74.4, 52.9 ppm; MS (ESI):  $m/z$  ( $[\text{M}+\text{H}]^+$ ): 293; HRMS (ESI):  $m/z$  calcd for  $\text{C}_{17}\text{H}_{13}\text{O}_3\text{N}_2$ : 293.0925; found: 293.0925

**Methyl 2-(thiophen-2-yl)-4H-benzo[d][1,3]oxazine-4-carboxylate (5e):**

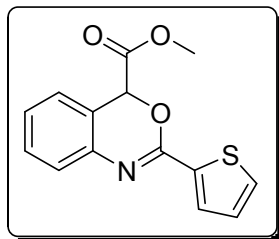

Solid, m.p.108-110 °C;  $^1\text{H}$  NMR (500 MHz,  $\text{CDCl}_3$ ):  $\delta$  7.80 (d,  $J= 3.7$  Hz, 1H), 7.52 (d,  $J= 6.0$  Hz, 1H), 7.37-7.10 (m, 5H), 5.88 (s, 1H), 3.73 (s, 3H) ppm;  $^{13}\text{C}$  NMR (125 MHz,  $\text{CDCl}_3$ ):  $\delta$  168.5, 152.2, 137.8, 135.7, 130.2, 130.1, 129.6, 127.3, 126.1, 125.2, 124.6, 119.4, 74.4, 53.0 ppm; MS (ESI):  $m/z$  ( $[\text{M}+\text{H}]^+$ ): 274; HRMS (ESI):  $m/z$  calcd for  $\text{C}_{14}\text{H}_{12}\text{O}_3\text{NS}$ : 274.0538; found: 274.0537.

**Methyl 2-(4-fluorophenyl)-4H-benzo[d][1,3]oxazine-4-carboxylate (5f):**

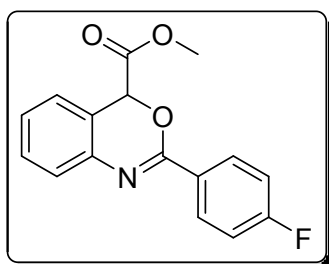

Solid, m.p.86-88 °C;  $^1\text{H}$  NMR (500 MHz,  $\text{CDCl}_3$ ):  $\delta$  8.31-8.23 (m, 2H), 7.42-7.08 (m, 7H), 5.95 (s, 1H), 3.75 (s, 3H) ppm;  $^{13}\text{C}$  NMR (125 MHz,  $\text{CDCl}_3$ ):  $\delta$  169.2, 166.0, 164.0, 155.4, 138.2, 130.6, 130.0, 128.2, 126.7, 125.6, 125.1, 119.8, 115.4, 115.2, 74.3, 52.8 ppm; MS (ESI):  $m/z$  ( $[\text{M}+\text{H}]^+$ ): 286; HRMS (ESI):  $m/z$  calcd for  $\text{C}_{16}\text{H}_{13}\text{O}_3\text{NF}$ : 286.0877; found: 286.0877.

**Methyl 2-(3-methoxyphenyl)-4H-benzo[d][1,3]oxazine-4-carboxylate (5g):**

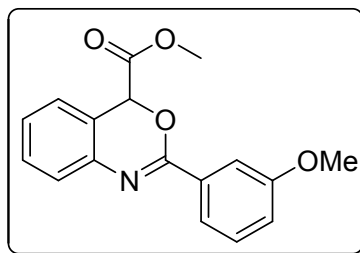

Semi Solid;  $^1\text{H}$  NMR (500 MHz,  $\text{CDCl}_3$ ):  $\delta$  7.79-7.70 (m, 2H), 7.42-7.20 (m, 5H), 7.09-7.05 (m, 1H), 5.95 (s, 1H), 3.90 (s, 3H), 3.74 (m, 3H) ppm;  $^{13}\text{C}$  NMR (75 MHz,  $\text{CDCl}_3$ ):  $\delta$  169.3, 159.4, 138.3, 133.4, 129.9, 129.2, 126.7, 125.5, 125.2, 120.8, 118.1, 112.7, 74.3, 55.4, 52.8 ppm; MS (ESI):  $m/z$  ( $[\text{M}+\text{H}]^+$ ): 298; HRMS (ESI):  $m/z$  calcd for  $\text{C}_{17}\text{H}_{16}\text{O}_4\text{N}$ : 298.1070; found: 298.1072.

**Methyl 2-(4-chlorophenyl)-4H-benzo[d][1,3]oxazine-4-carboxylate (5h):**

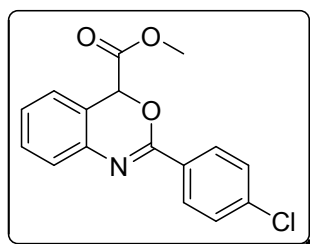

Solid, m.p.72-74 °C;  $^1\text{H}$  NMR (300 MHz,  $\text{CDCl}_3$ ):  $\delta$  8.25-8.17 (m, 2H), 7.42-7.13 (m, 6H), 5.95 (s, 1H), 3.75 (s, 3H) ppm;  $^{13}\text{C}$  NMR (125 MHz,  $\text{CDCl}_3$ ):  $\delta$  168.5, 154.8, 137.7, 137.3, 136.9, 130.2, 129.6, 129.2, 128.1, 126.5, 125.2, 124.9, 119.5, 74.3, 53.0 ppm; MS (ESI):  $m/z$  ( $[\text{M}+\text{H}]^+$ ): 302; HRMS (ESI):  $m/z$  calcd for  $\text{C}_{16}\text{H}_{13}\text{ClNO}_3$ : 302.0855; found: 302.0853.

**Methyl 2-(4-methoxyphenyl)-4H-benzo[d][1,3]thiazine-4-carboxylate (6b):**

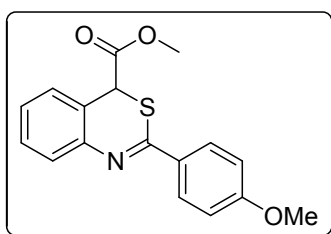

Solid, m.p.132-134 °C;  $^1\text{H}$  NMR (500 MHz,  $\text{CDCl}_3$ ):  $\delta$  8.12 (d,  $J$ = 8.9 Hz, 2H), 7.54-7.43 (m, 2H), 7.32-7.22 (m, 2H), 6.99 (d,  $J$ = 8.9 Hz, 2H), 4.88 (s, 1H), 3.89 (s, 3H), 3.65 (s, 3H) ppm;  $^{13}\text{C}$  NMR (75 MHz,  $\text{CDCl}_3$ ):  $\delta$  170.1, 162.6, 156.7, 143.6, 130.0, 129.4, 127.8, 127.3, 117.3,



113.8, 55.4, 53.1, 44.2 ppm; MS (ESI):  $m/z$  ( $[M+H]^+$ ): 314; HRMS (ESI):  $m/z$  calcd for  $C_{17}H_{16}O_3NS$ : 314.0846; found: 314.0847.

**Methyl 2-(thiophen-2-yl)-4*H*-benzo[*d*][1,3]thiazine-4-carboxylate (6c):**

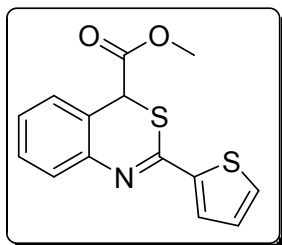

Solid, m.p.124-126 °C;  $^1H$  NMR (300 MHz,  $CDCl_3$ ):  $\delta$  7.83-7.87 (m, 1H), 7.60-7.10 (m, 9H), 5.91 (s, 1H), 3.76 (s, 3H) ppm;  $^{13}C$  NMR (75 MHz,  $CDCl_3$ ):  $\delta$  168.5, 152.2, 137.8, 135.7, 130.5, 130.2, 130.1, 129.6, 129.1, 127.5, 127.3, 126.1, 125.2, 124.6, 119.4, 74.4, 53.0 ppm; MS (ESI):  $m/z$  ( $[M+H]^+$ ): 290; HRMS (ESI):  $m/z$  calcd for  $C_{14}H_{12}O_2NS_2$ : 290.0306; found: 290.0306.

**Methyl 2-(4-chlorophenyl)-4*H*-benzo[*d*][1,3]thiazine-4-carboxylate (6d):**

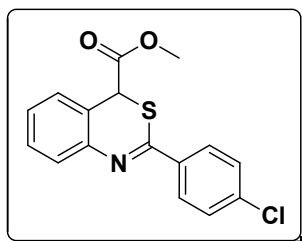

Solid, m.p.78-80 °C;  $^1H$  NMR (500 MHz,  $CDCl_3$ ):  $\delta$  8.19 (d,  $J= 8.6$  Hz, 2H), 7.34-7.10 (m, 3H), 6.89 (d,  $J= 8.7$  Hz, 2H), 5.96 (s, 1H), 3.81 (s, 3H) ppm;  $^{13}C$  NMR (125 MHz,  $CDCl_3$ ):  $\delta$  169.5, 166.4, 164.5, 155.5, 138.5, 130.5, 130.3, 126.3, 125.6, 125.3, 119.8, 115.5, 115.3, 74.5, 55.3, 52.7 ppm; MS (ESI):  $m/z$  ( $[M+H]^+$ ): 318; HRMS (ESI):  $m/z$  calcd for  $C_{16}H_{13}ClNO_2S$ : 318.0357; found: 318.0349.

**Methyl 2-phenyl-4*H*-benzo[*d*][1,3]thiazine-4-carboxylate (6a):**

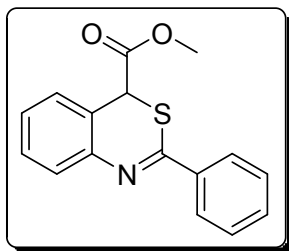

Solid, m.p.104-106 °C;  $^1\text{H}$  NMR (500 MHz,  $\text{CDCl}_3$ ):  $\delta$  8.07 (d,  $J= 7.9$  Hz, 2H), 7.49-7.35 (m, 5H), 7.26-7.17 (m, 2H), 4.82 (s, 1H), 3.58 (s, 3H) ppm;  $^{13}\text{C}$  NMR (75 MHz,  $\text{CDCl}_3$ ):  $\delta$  168.5, 152.2, 137.8, 135.7, 130.2, 130.1, 129.6, 127.3, 126.1, 125.2, 124.6, 119.4, 74.4, 53.0 ppm; MS (ESI):  $m/z$  ( $[\text{M}+\text{H}]^+$ ): 284; HRMS (ESI):  $m/z$  calcd for  $\text{C}_{16}\text{H}_{14}\text{O}_2\text{NS}$ : 284.0744; found: 284.0745.

**Copies of  $^1\text{H}$  and  $^{13}\text{C}$  NMR spectra:**

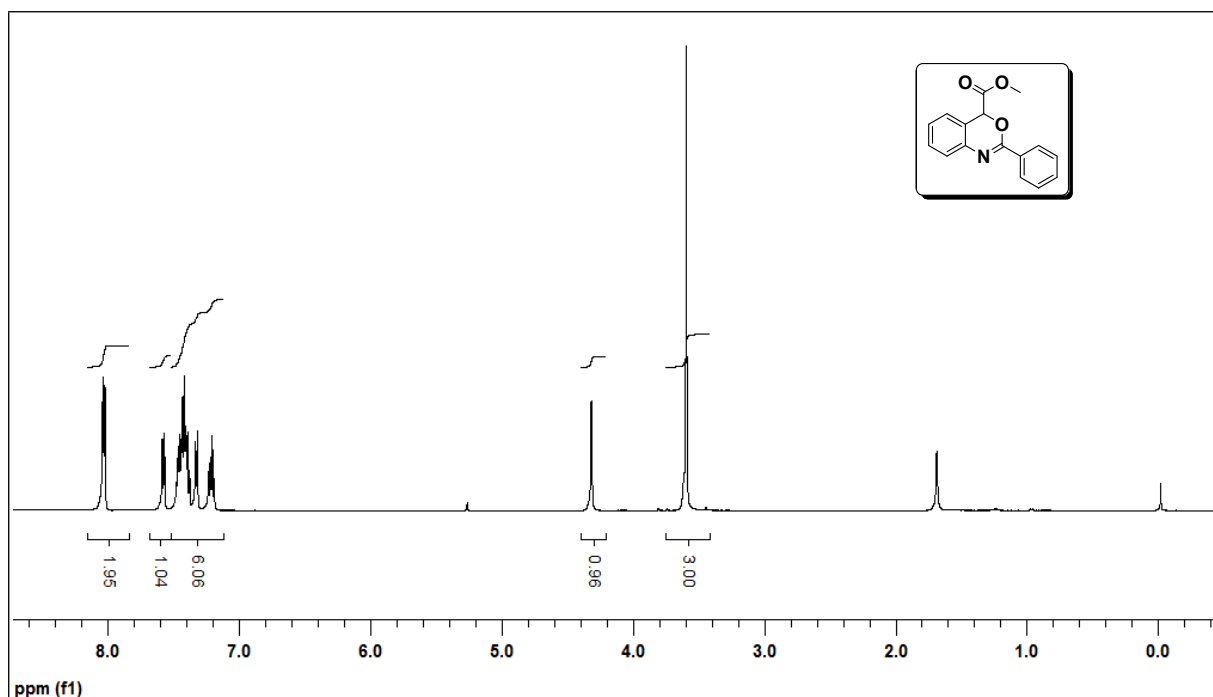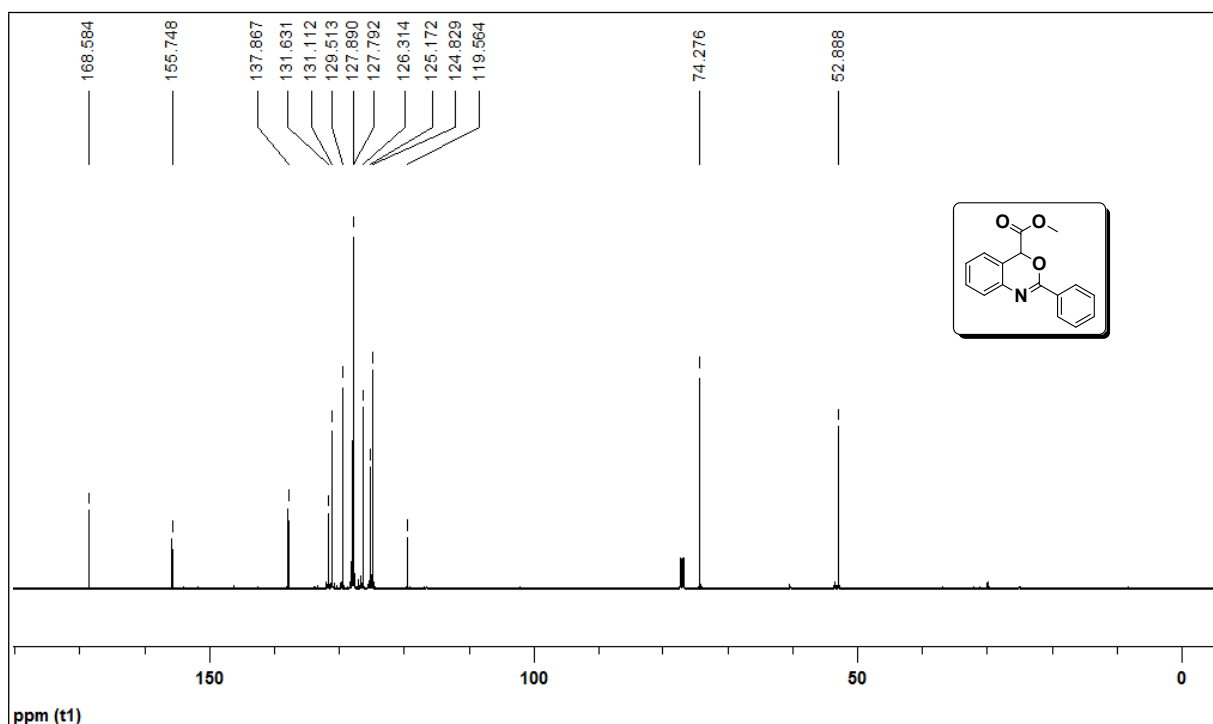

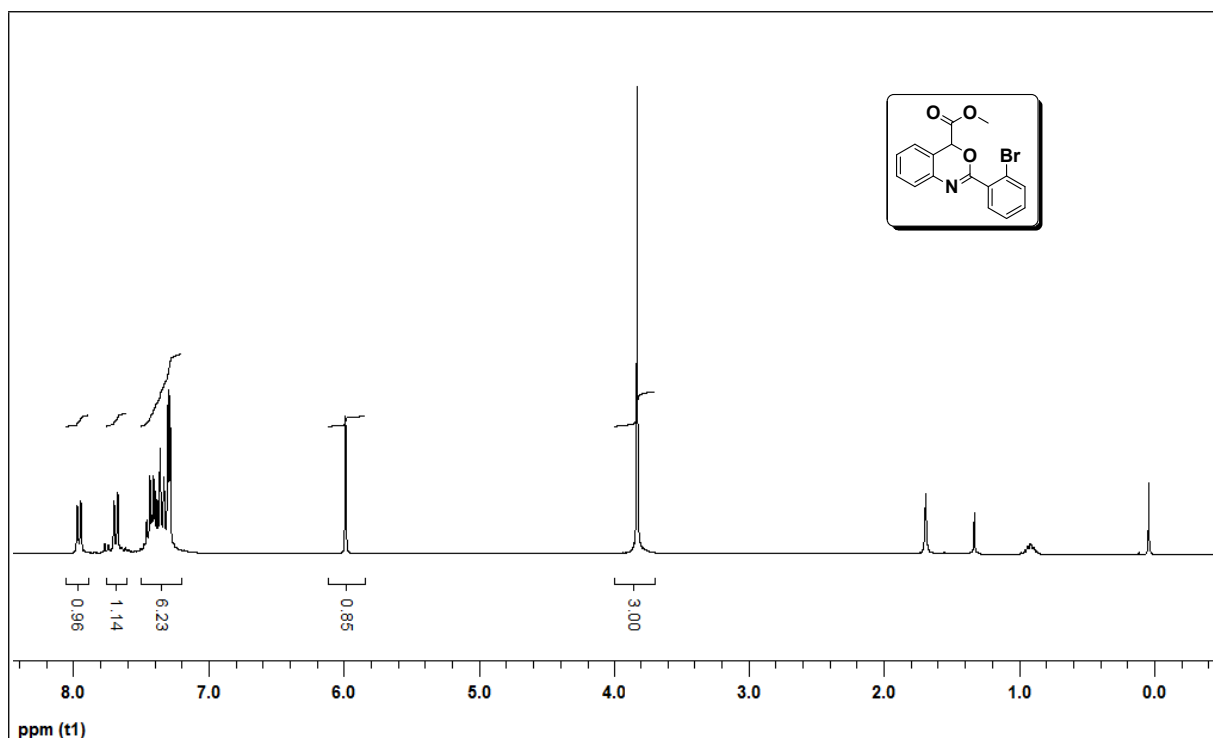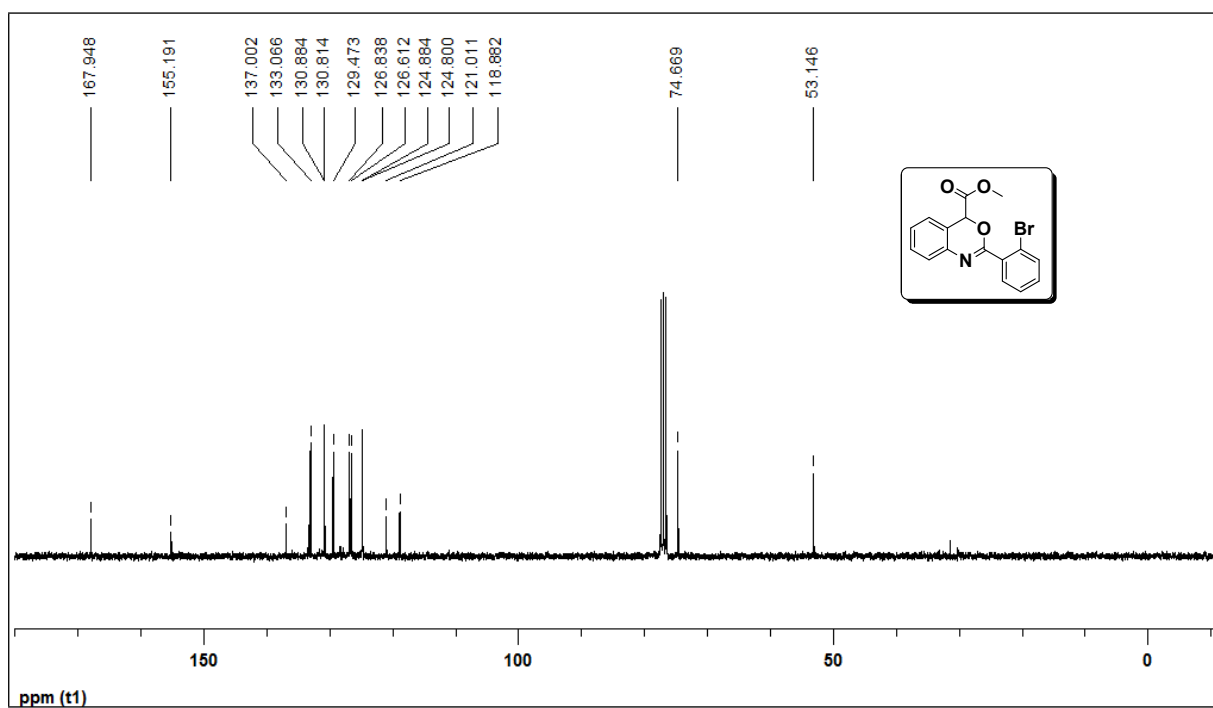

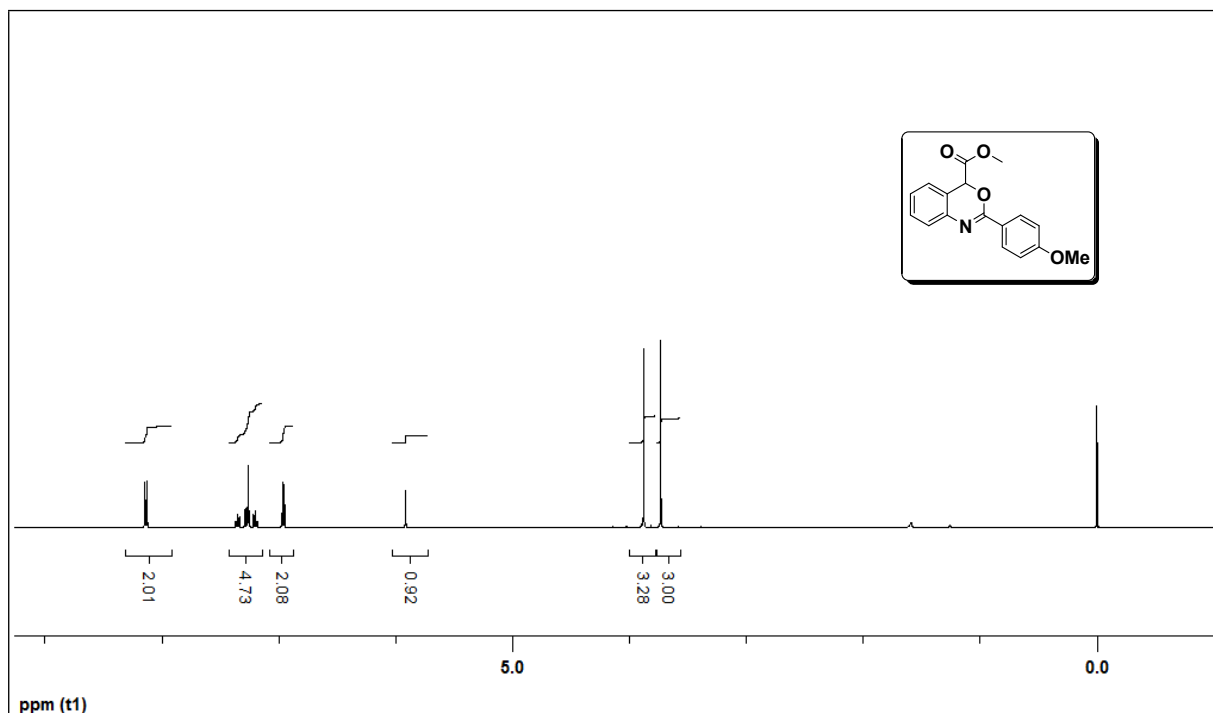

<sup>1</sup>H NMR (500 MHz, CDCl<sub>3</sub>) spectrum of compound 5c

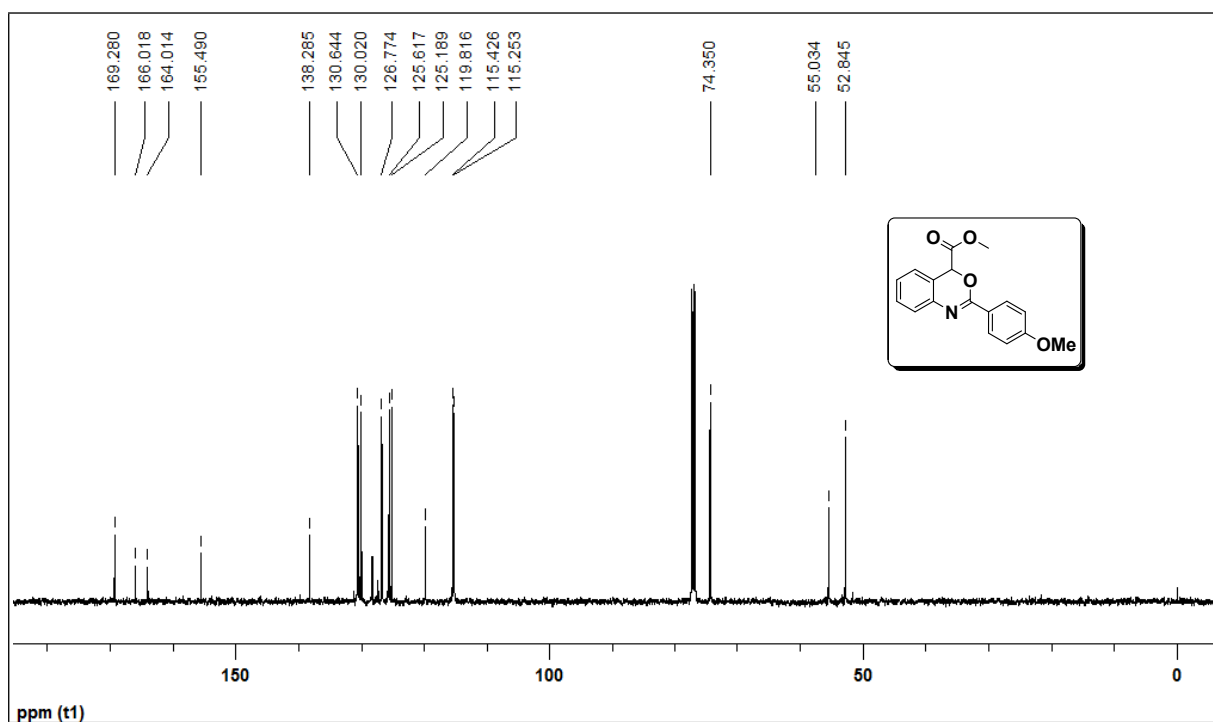

<sup>13</sup>C NMR (75 MHz, CDCl<sub>3</sub>) spectrum of compound 5c

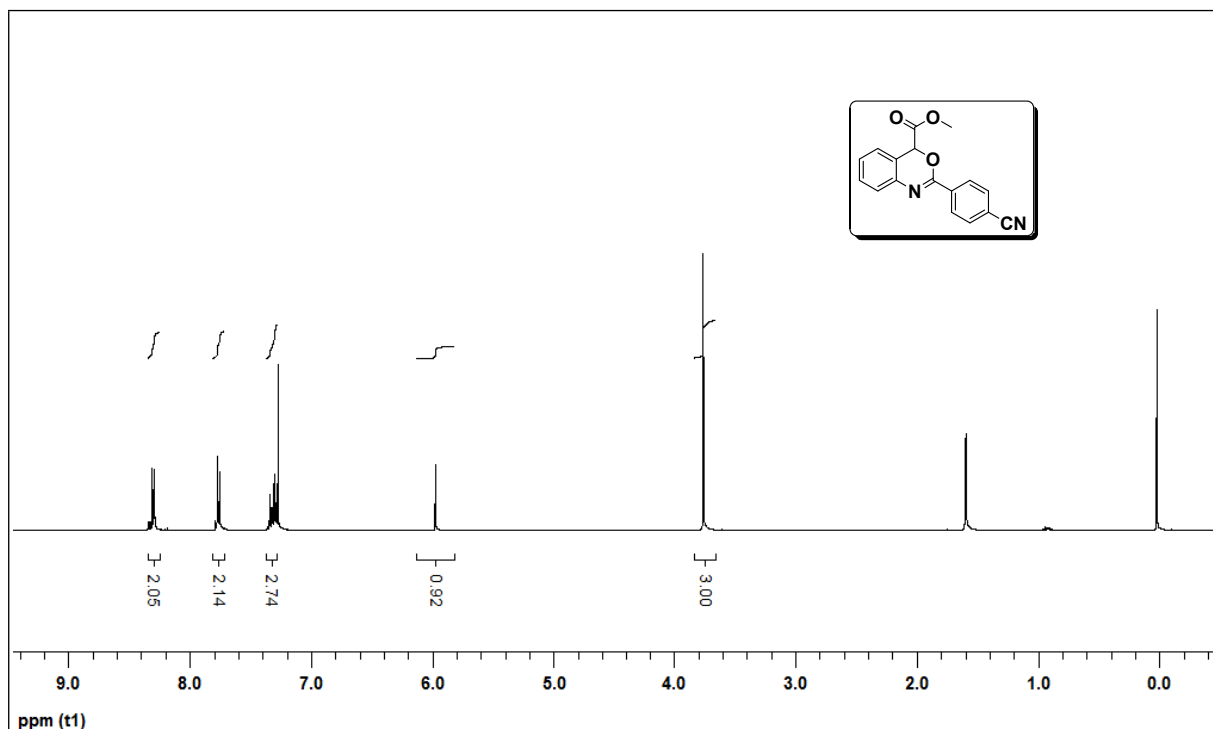

**<sup>1</sup>H NMR (500 MHz, CDCl<sub>3</sub>) spectrum of compound 5d**

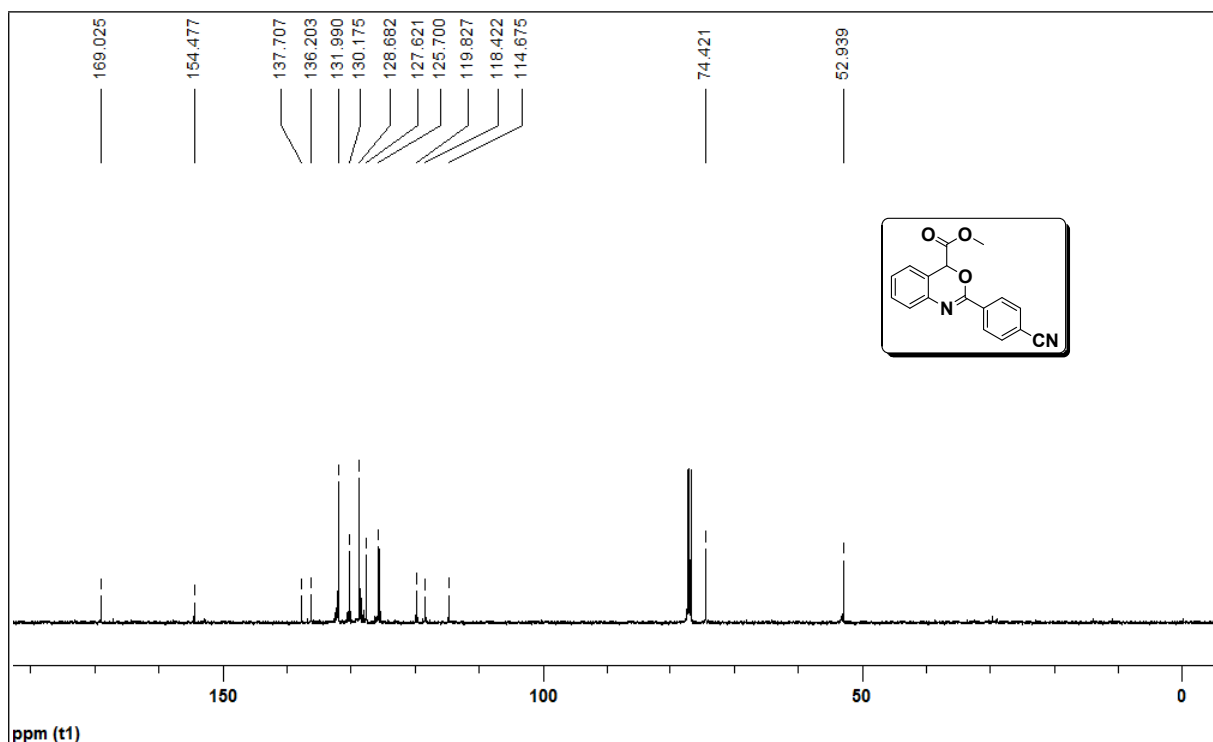

**<sup>13</sup>C NMR (75 MHz, CDCl<sub>3</sub>) spectrum of compound 5d**

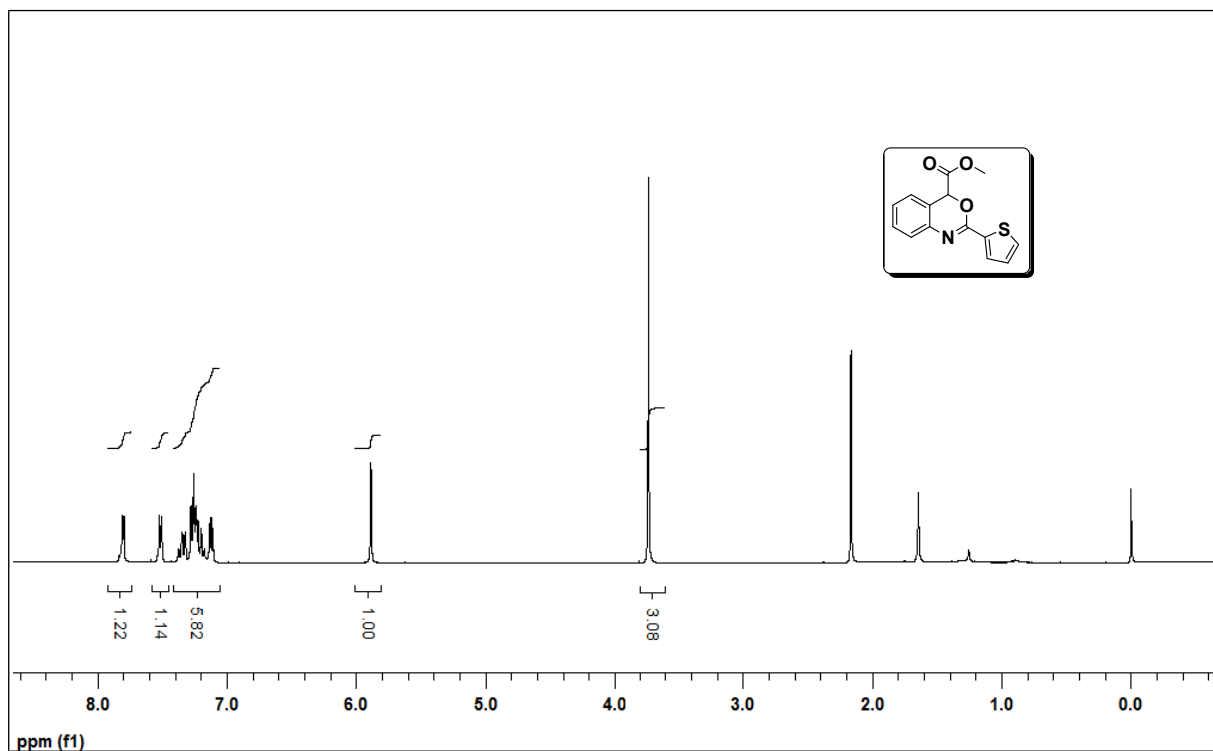

$^1\text{H NMR}$  (500 MHz,  $\text{CDCl}_3$ ) spectrum of compound 5e

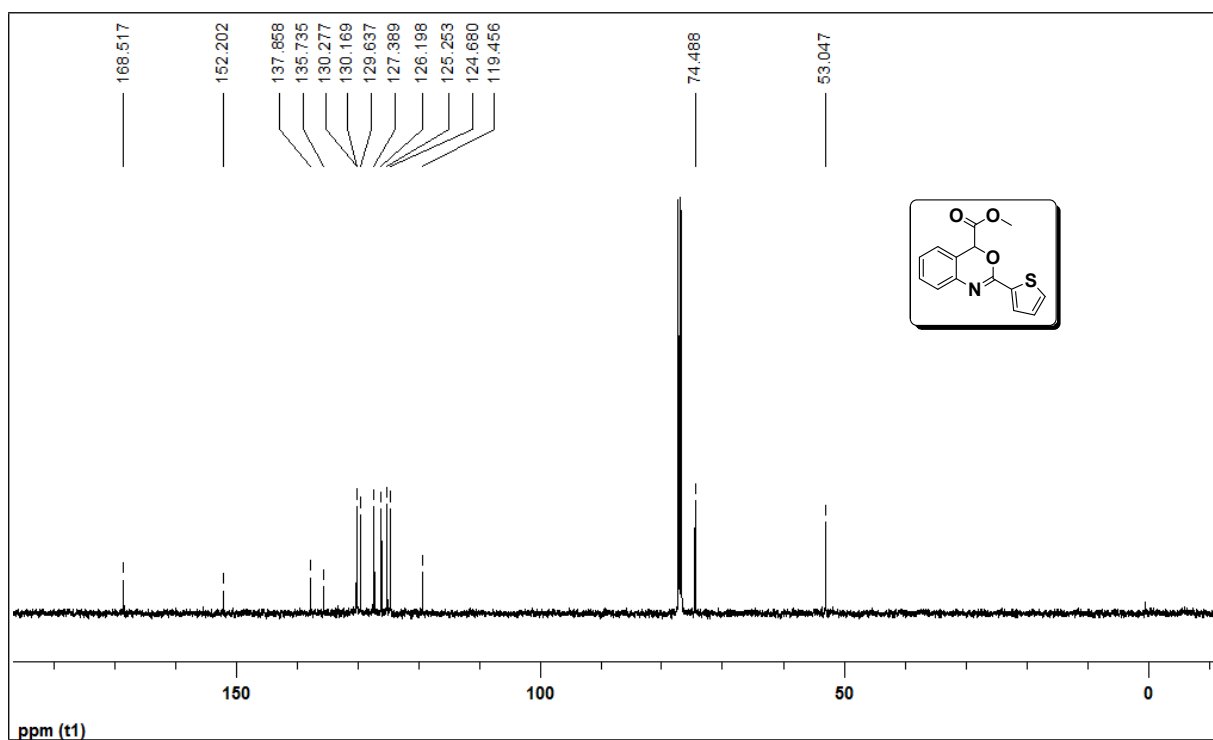

$^{13}\text{C NMR}$  (125 MHz,  $\text{CDCl}_3$ ) spectrum of compound 5e

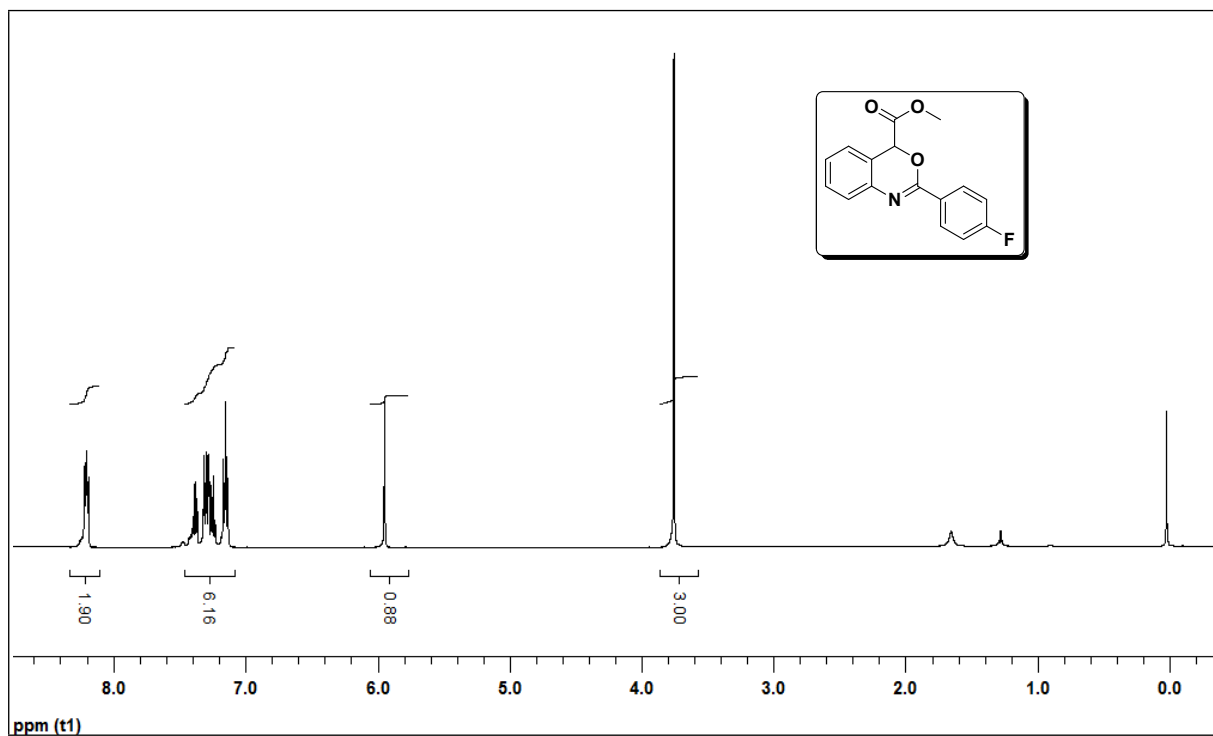

**<sup>1</sup>H NMR (500 MHz, CDCl<sub>3</sub>) spectrum of compound 5f**

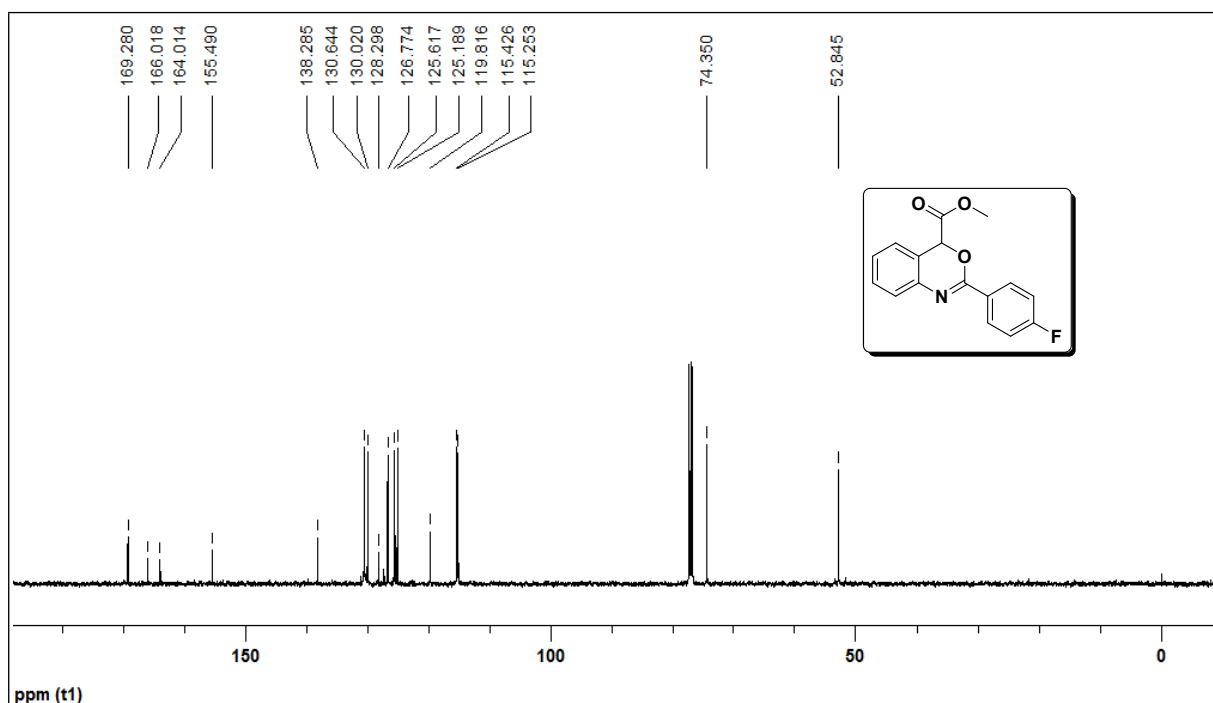

**<sup>13</sup>C NMR (125 MHz, CDCl<sub>3</sub>) spectrum of compound 5f**



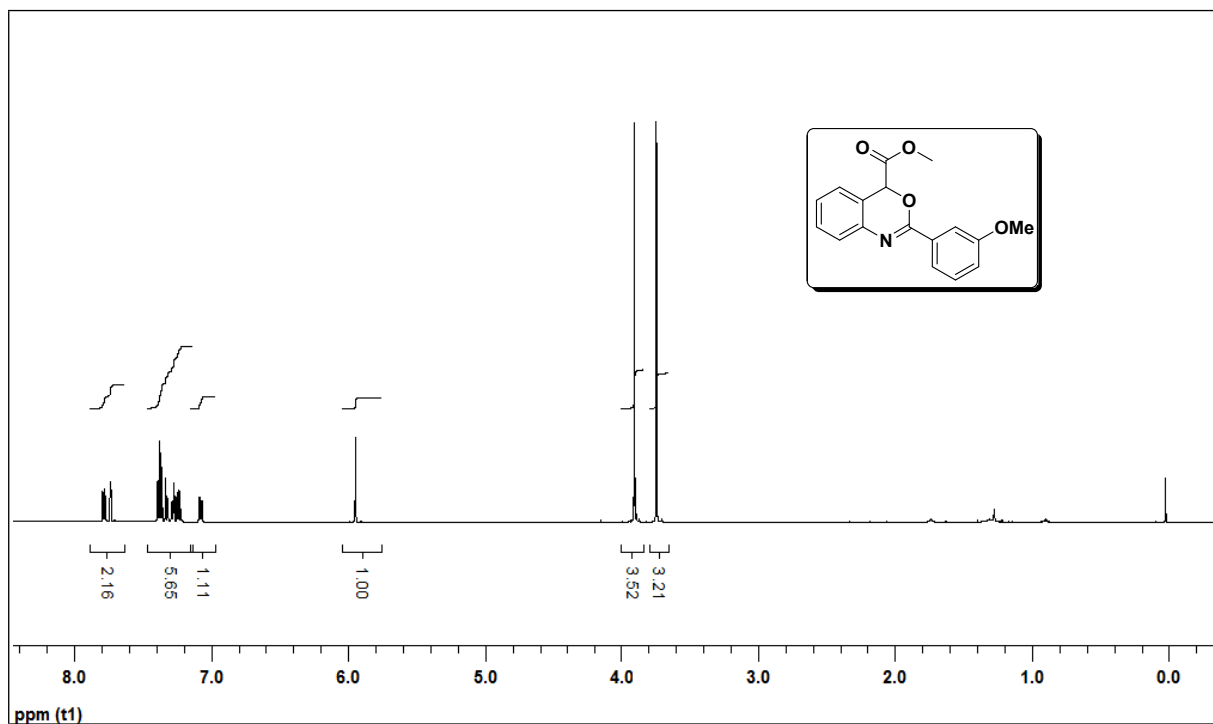

<sup>1</sup>H NMR (500 MHz, CDCl<sub>3</sub>) spectrum of compound 5g

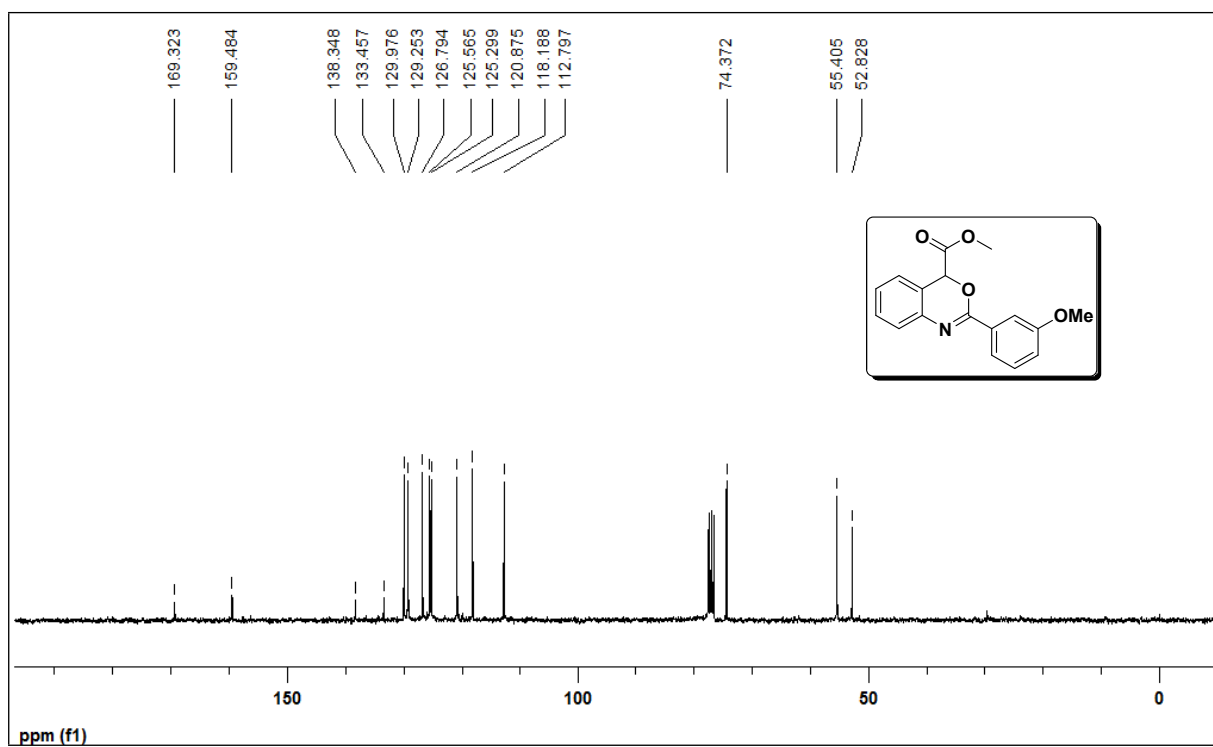

<sup>13</sup>C NMR (75 MHz, CDCl<sub>3</sub>) spectrum of compound 5g

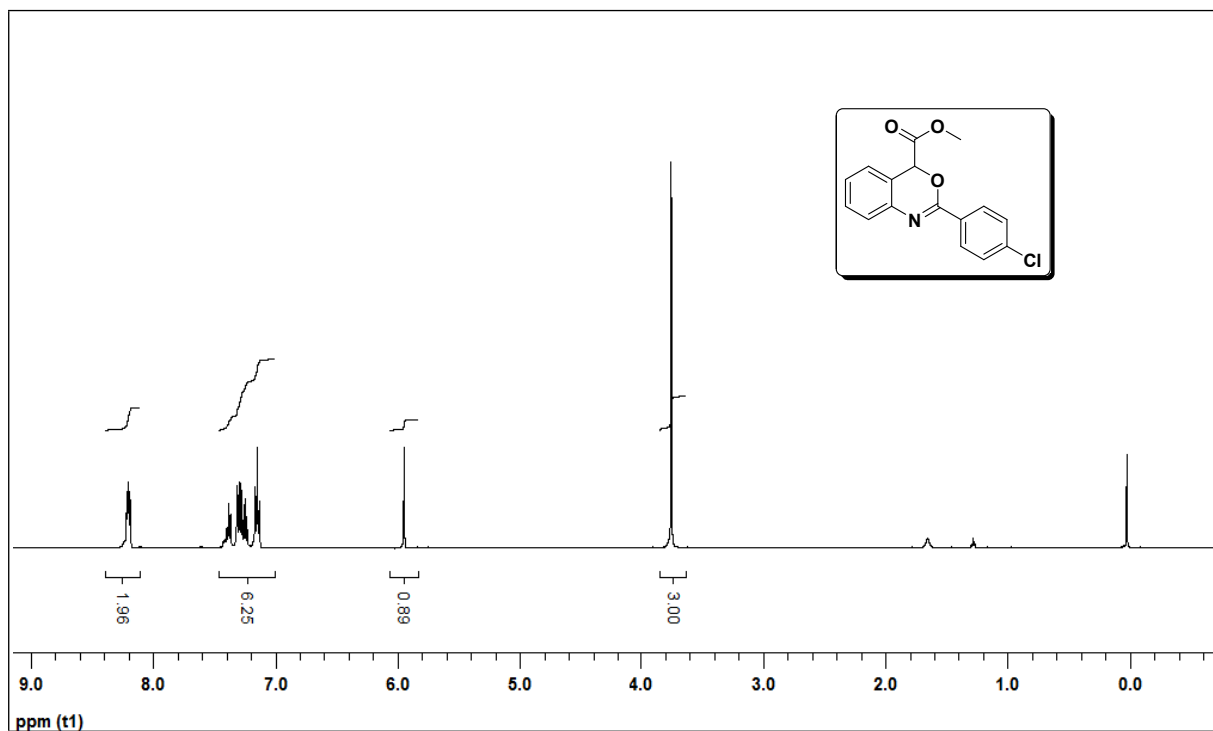

**<sup>1</sup>H NMR (300 MHz, CDCl<sub>3</sub>) spectrum of compound 5h**

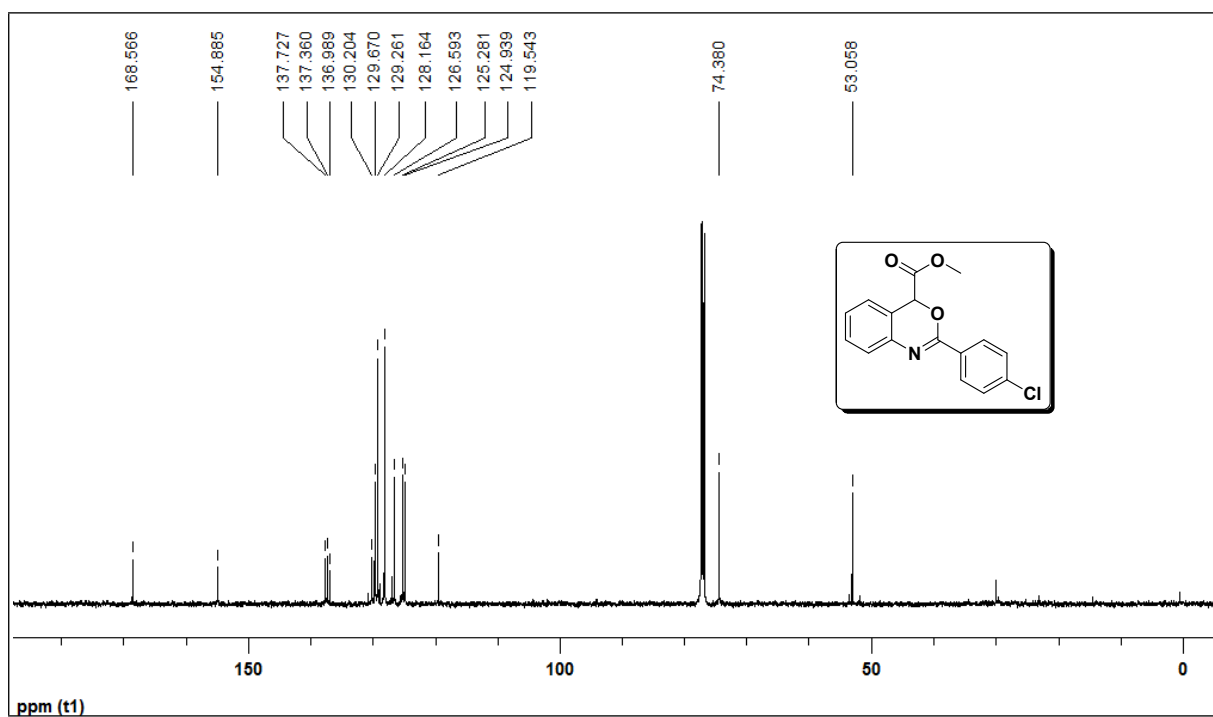

**<sup>13</sup>C NMR (125 MHz, CDCl<sub>3</sub>) spectrum of compound 5h**

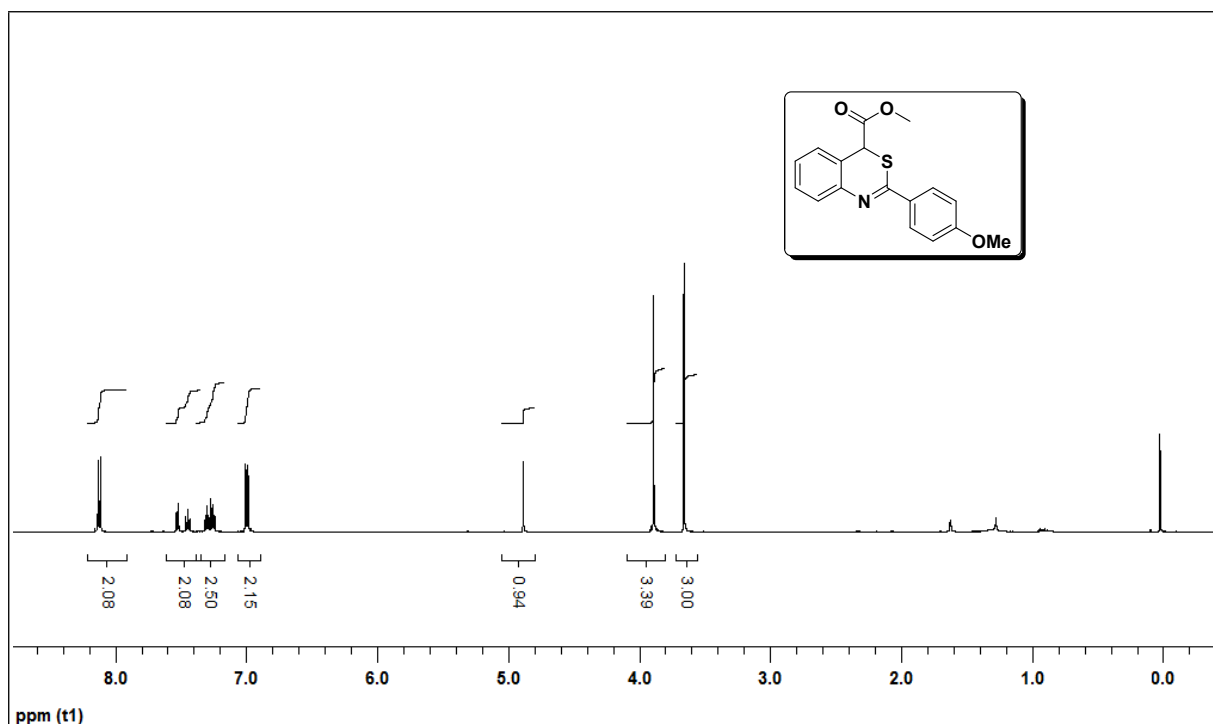

<sup>1</sup>H NMR (500 MHz, CDCl<sub>3</sub>) spectrum of compound 6b

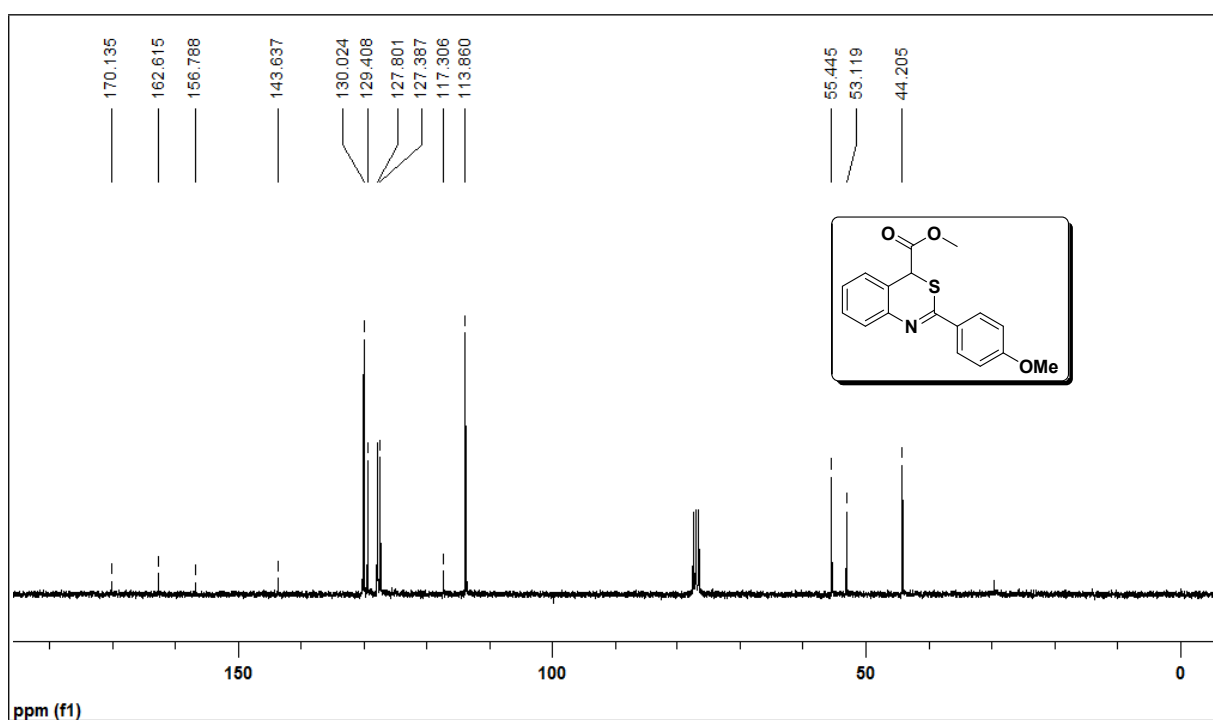

<sup>13</sup>C NMR (75 MHz, CDCl<sub>3</sub>) spectrum of compound 6b

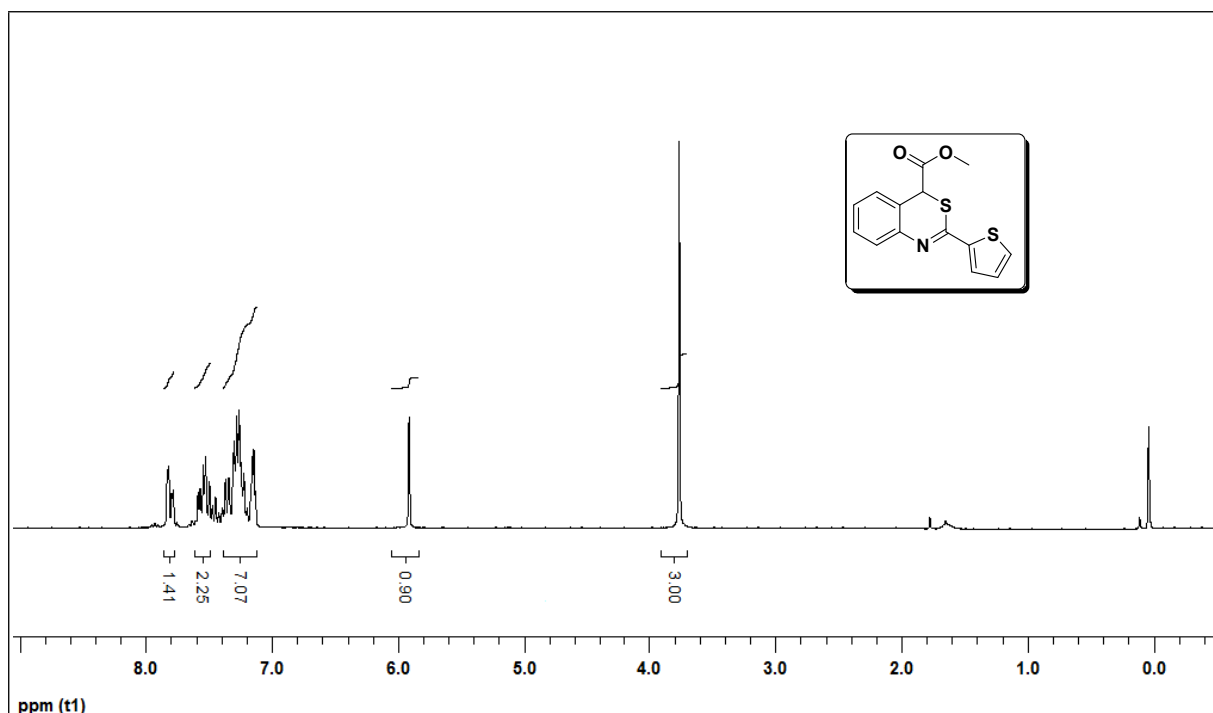

**<sup>1</sup>H NMR (300 MHz, CDCl<sub>3</sub>) spectrum of compound 6c**

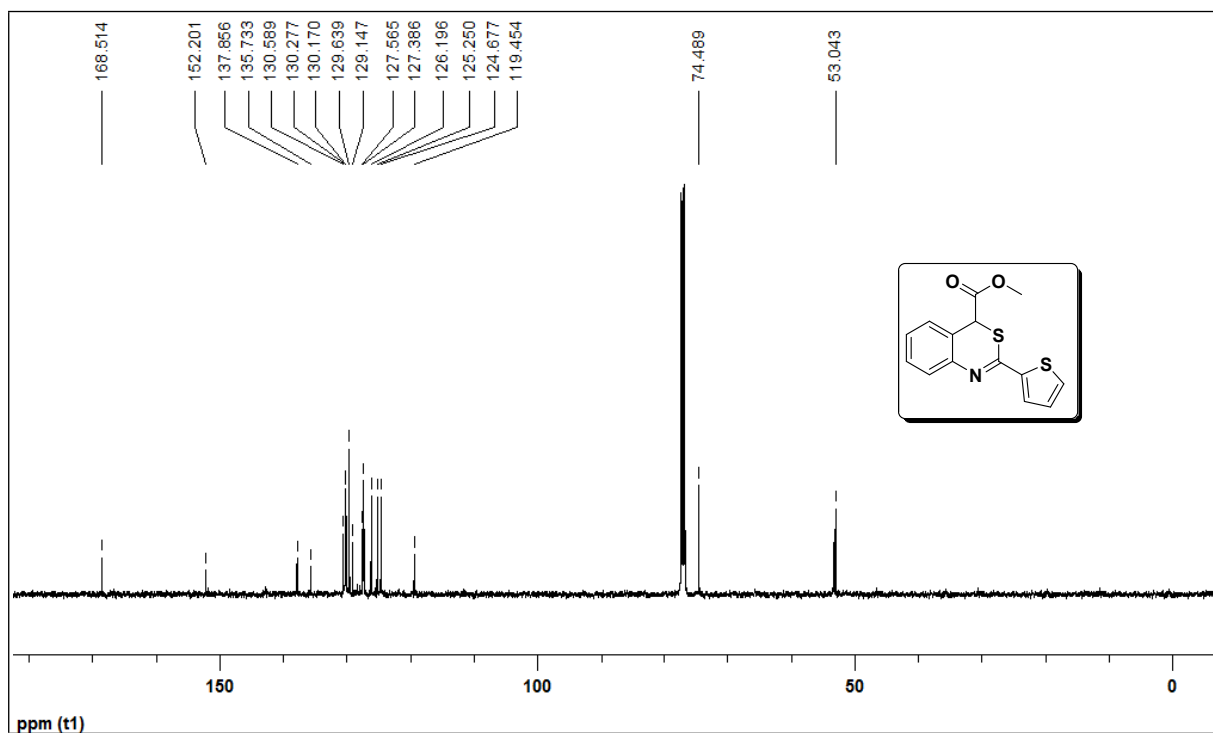

**<sup>13</sup>C NMR (75 MHz, CDCl<sub>3</sub>) spectrum of compound 6c**

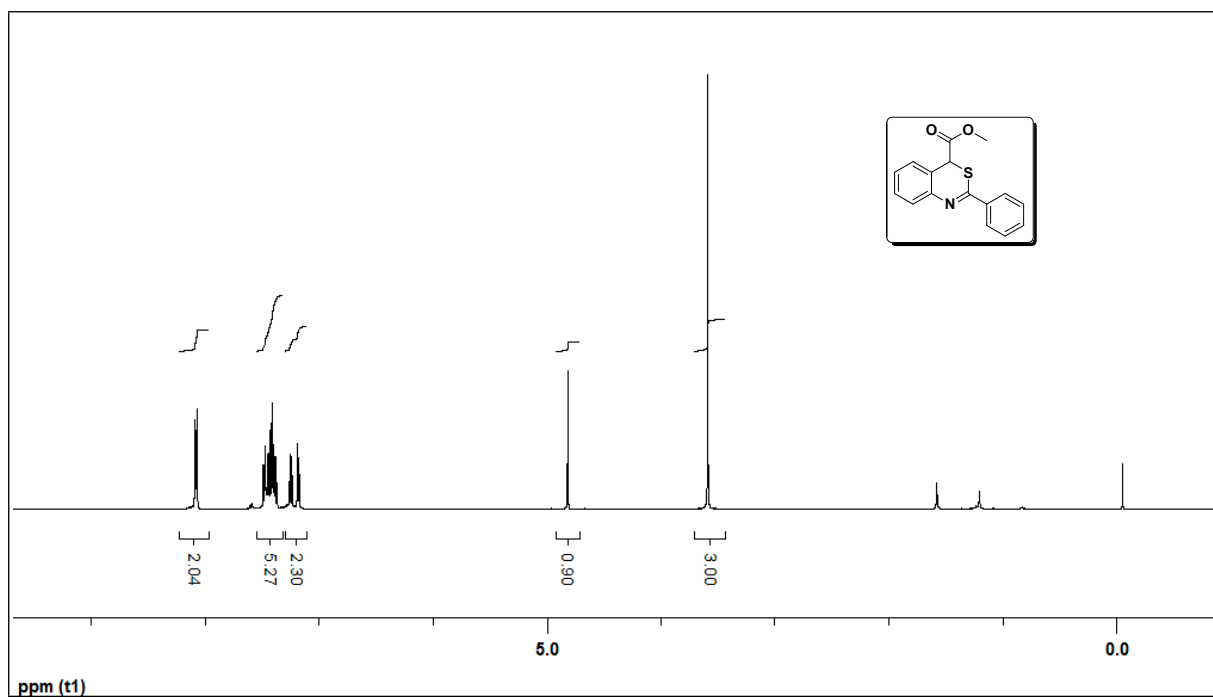

<sup>1</sup>H NMR (500 MHz, CDCl<sub>3</sub>) spectrum of compound 6a

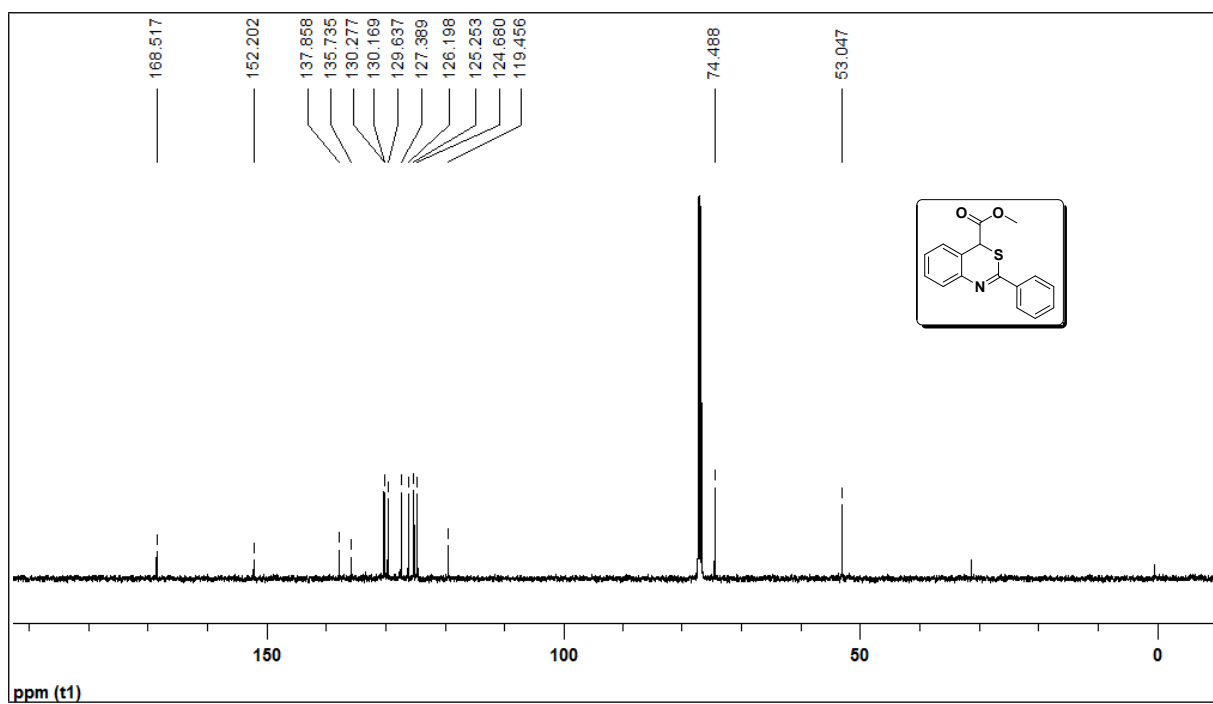

<sup>13</sup>C NMR (75 MHz, CDCl<sub>3</sub>) spectrum of compound 6a

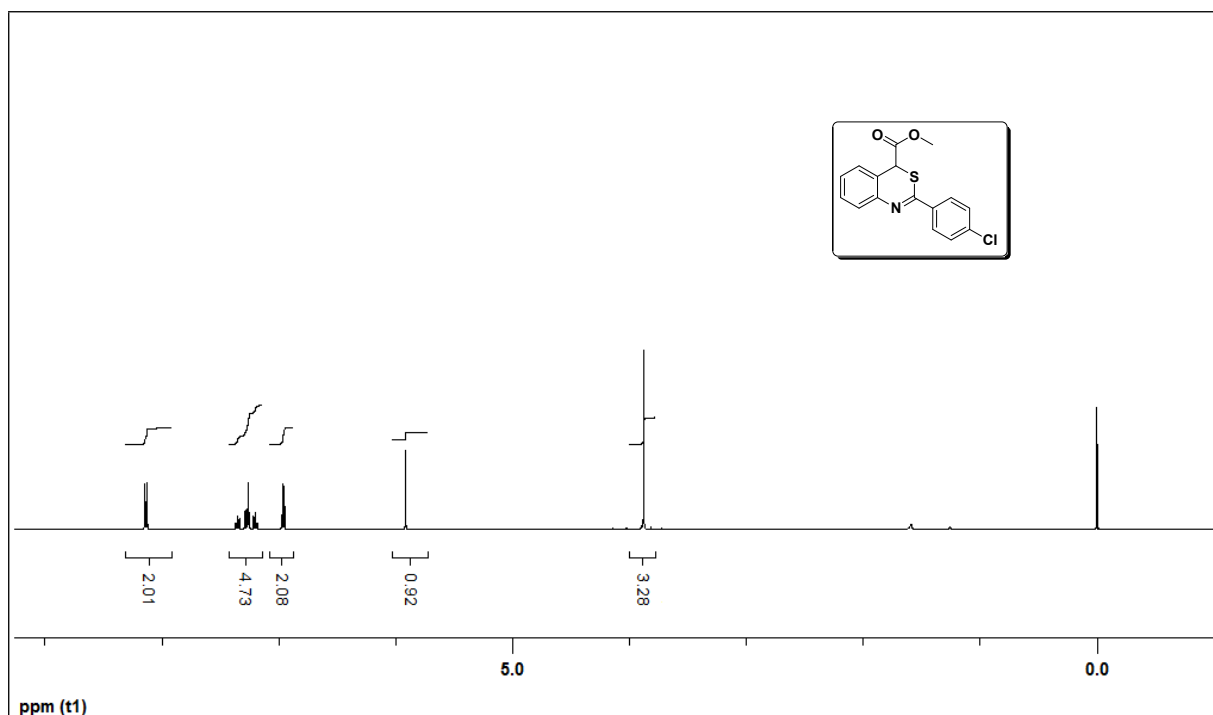

**<sup>1</sup>H NMR (500 MHz, CDCl<sub>3</sub>) spectrum of compound 6d**

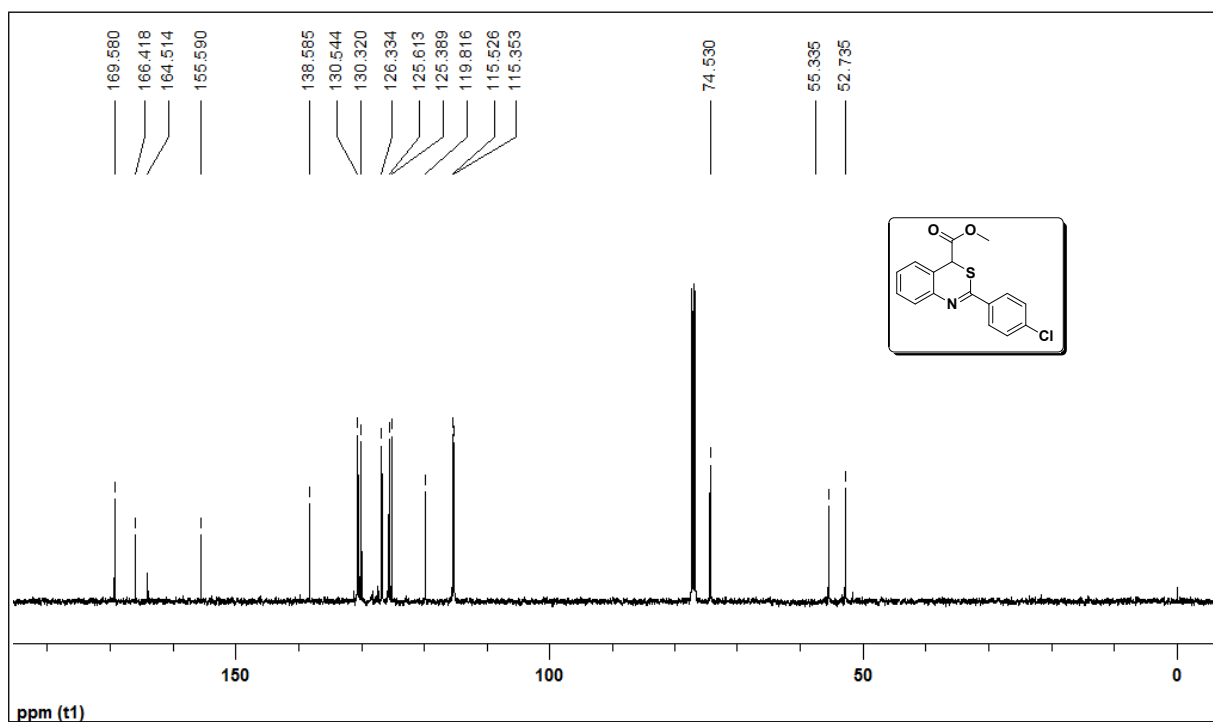

**<sup>13</sup>C NMR (125 MHz, CDCl<sub>3</sub>) spectrum of compound 6d**

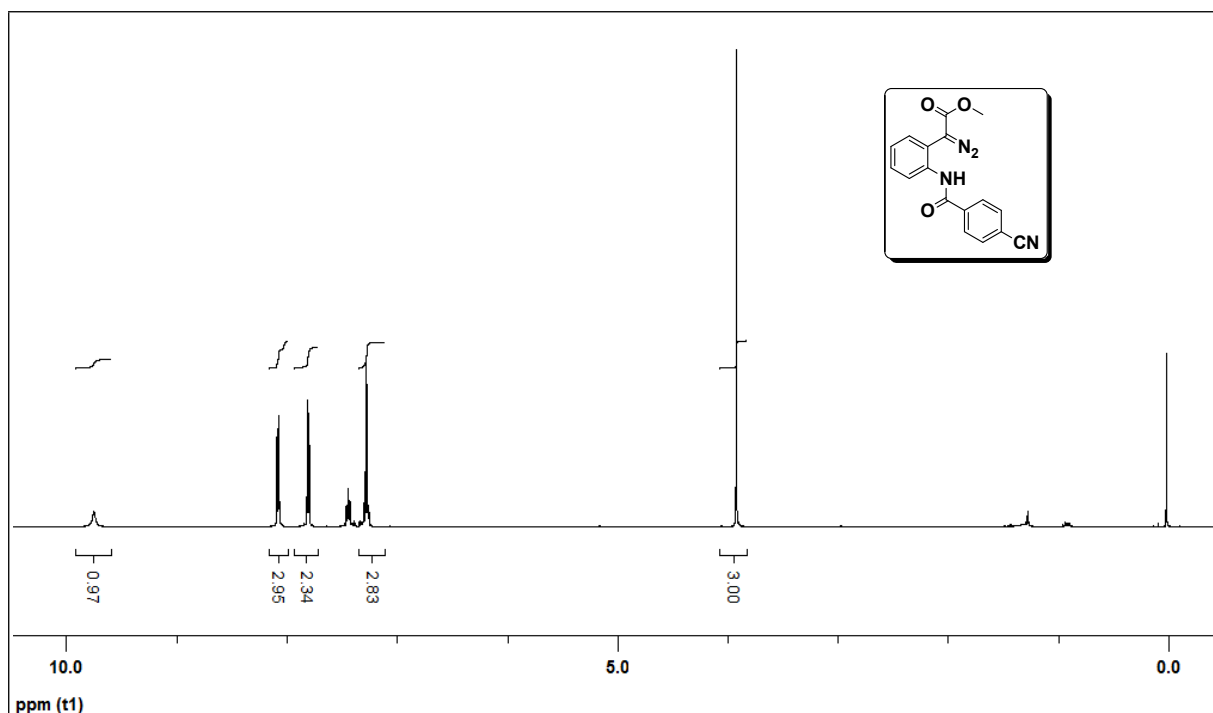

<sup>1</sup>H NMR (500 MHz, CDCl<sub>3</sub>) spectrum of compound 2d

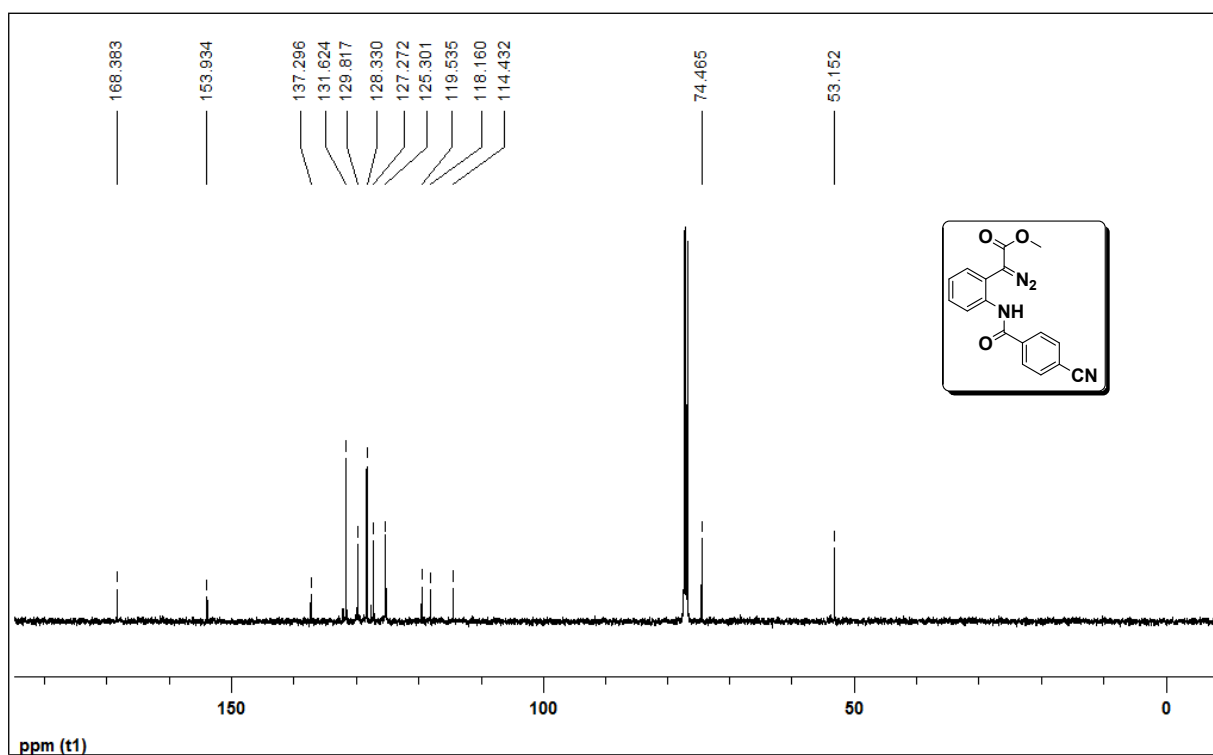

<sup>13</sup>C NMR (75 MHz, CDCl<sub>3</sub>) spectrum of compound 2d

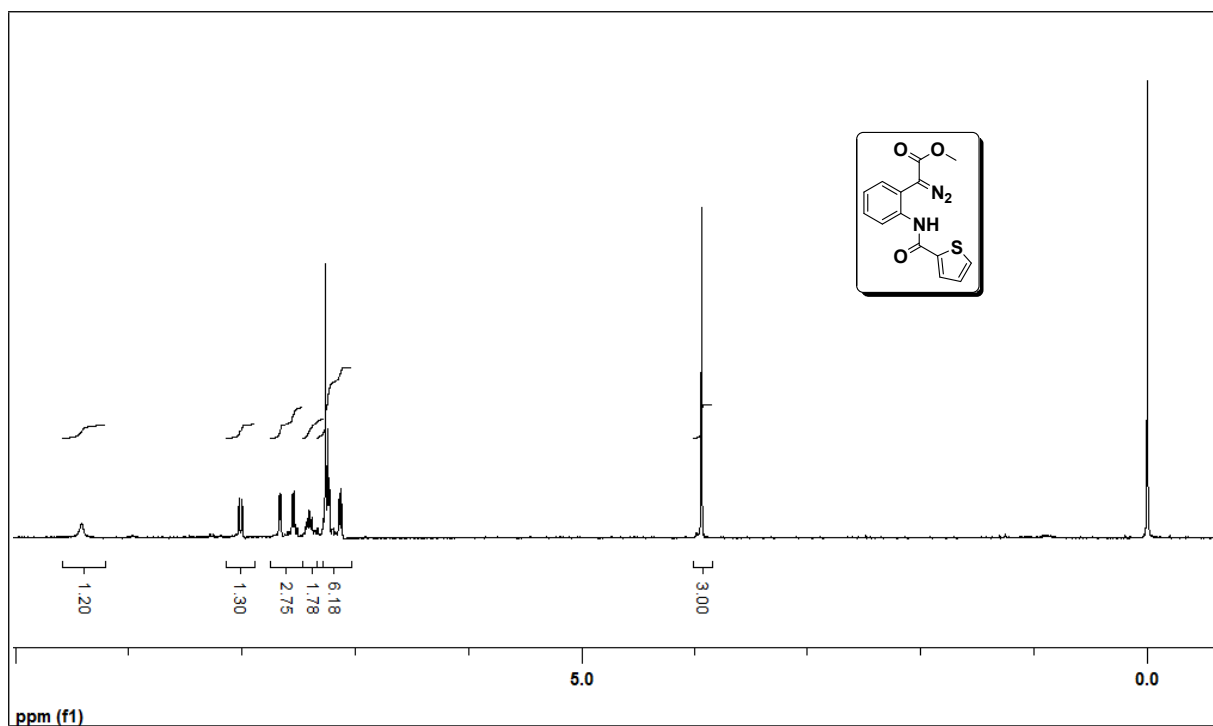

<sup>1</sup>H NMR (300 MHz, CDCl<sub>3</sub>) spectrum of compound 2e

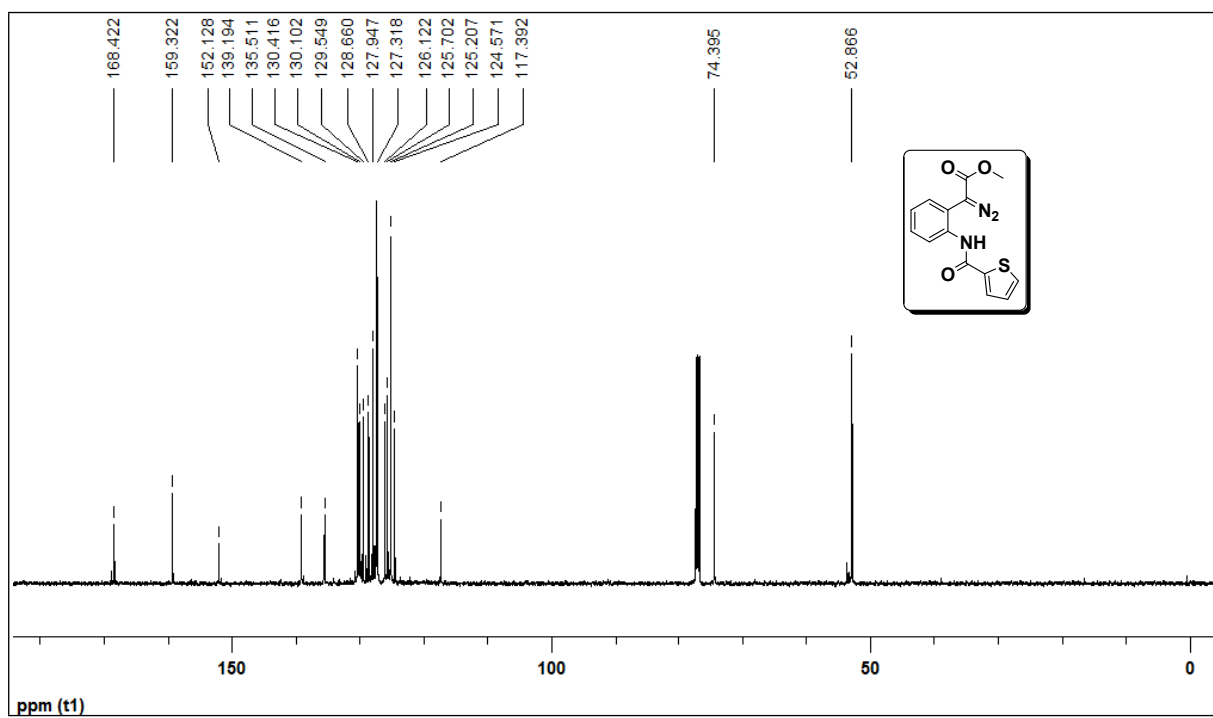

<sup>13</sup>C NMR (75 MHz, CDCl<sub>3</sub>) spectrum of compound 2e



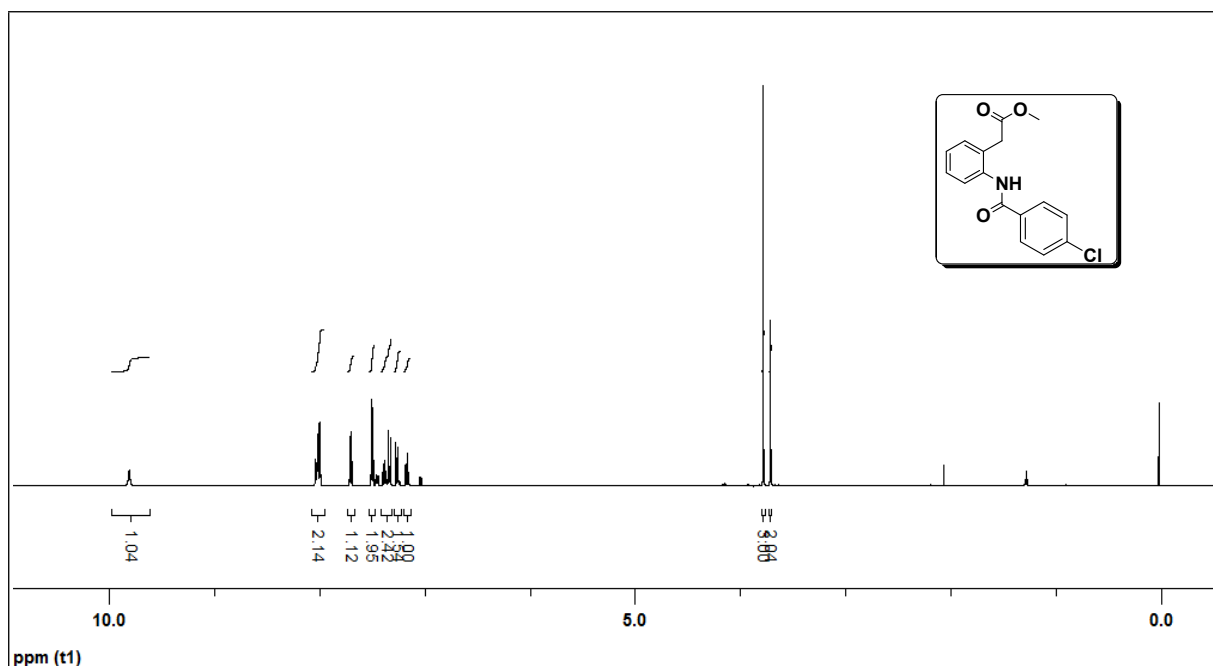

**<sup>1</sup>H NMR (500 MHz, CDCl<sub>3</sub>) spectrum of compound 1h**

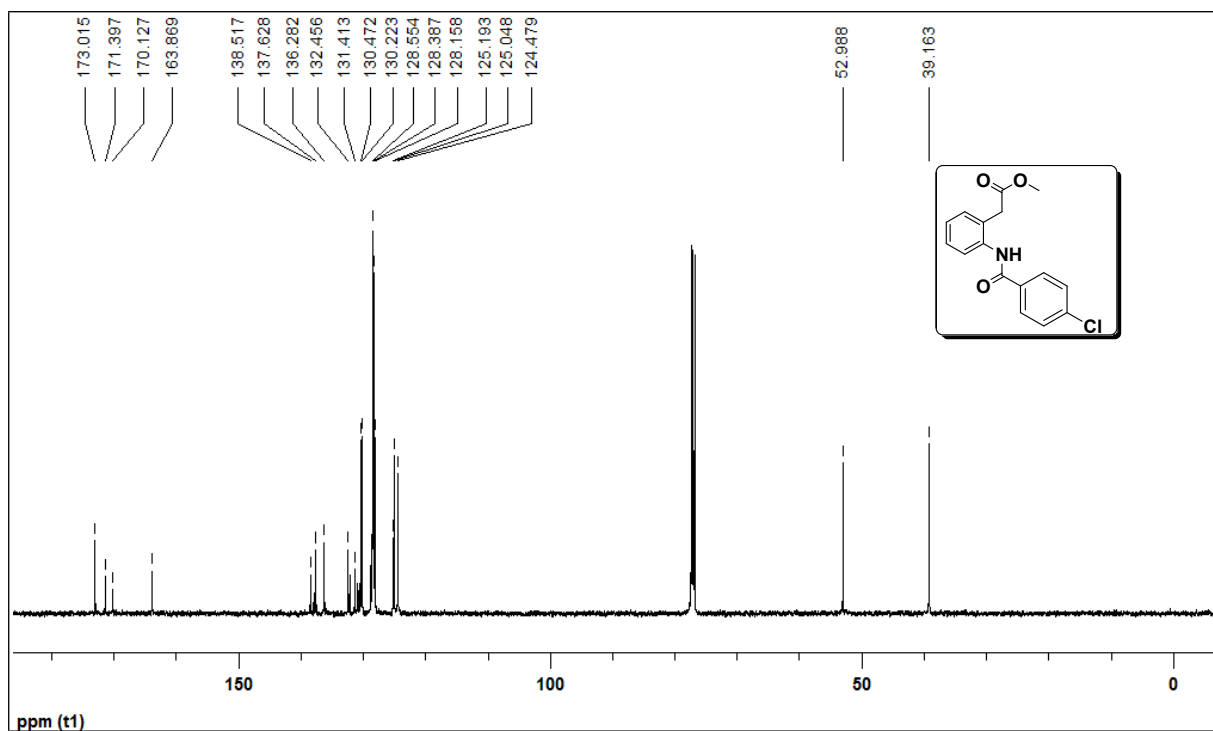

**<sup>13</sup>C NMR (75 MHz, CDCl<sub>3</sub>) spectrum of compound 1h**

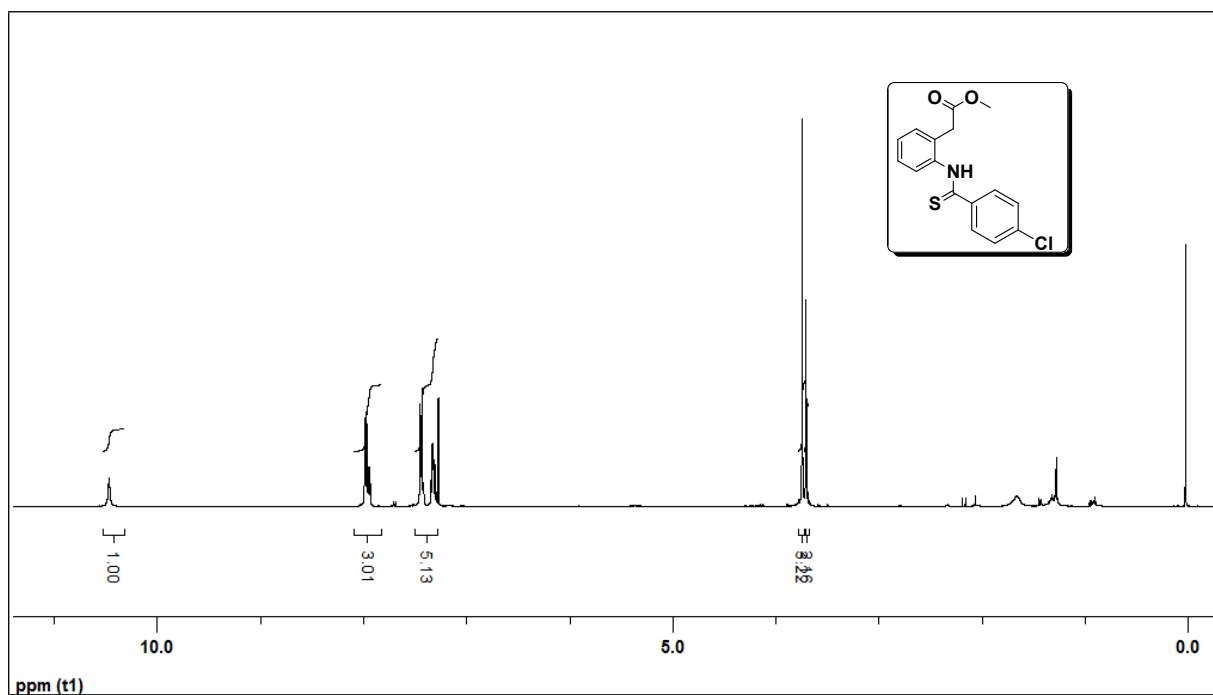

**<sup>1</sup>H NMR (300 MHz, CDCl<sub>3</sub>) spectrum of compound 3d**

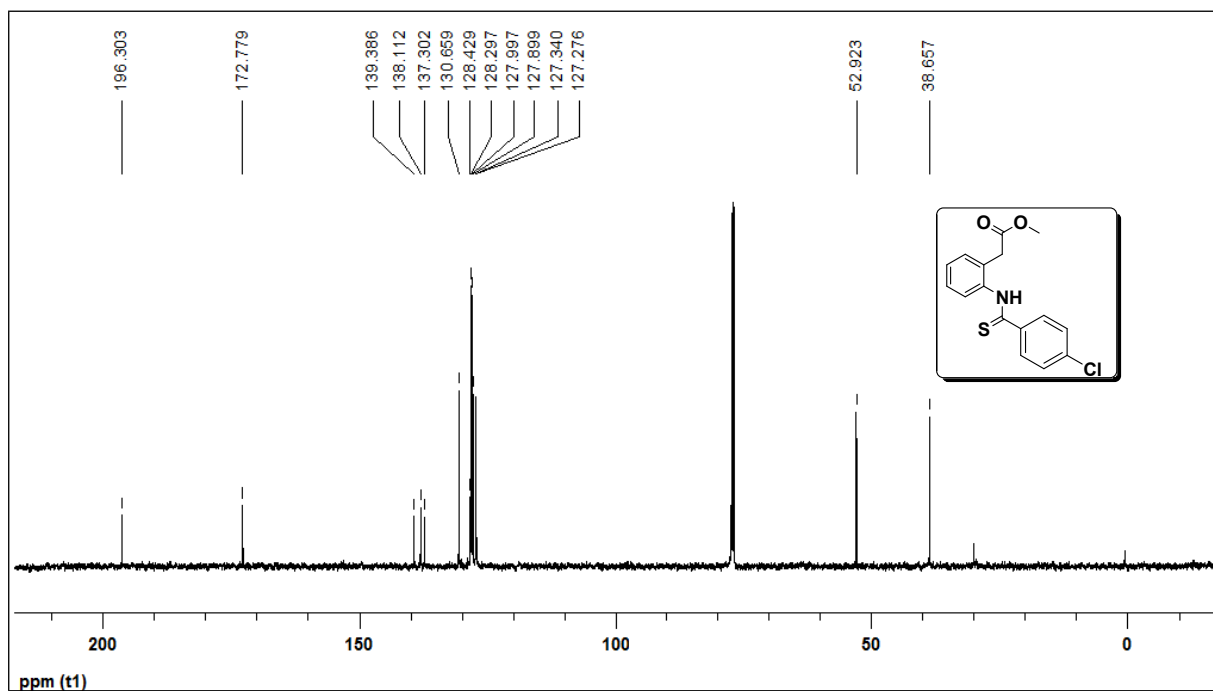

**<sup>13</sup>C NMR (75 MHz, CDCl<sub>3</sub>) spectrum of compound 3d**
